# Supplementary material for: Step-economical synthesis of 3-amido-2-quinolones by dendritic copper powder-mediated one-pot reaction
Source: Royal Society of Chemistry journal article supplement (doi:10.1039/c8ob01994k), 2018-01-01

## Supporting Information

### Step-Economic Synthesis of 3-Amido-2-Quinolones by Dendritic Copper-Mediated One-Pot Reaction

Byung Hoon Ahn, Ill Young Lee, Hee Nam Lim\*

#### Table of Contents

|                                                      |        |
|------------------------------------------------------|--------|
| <sup>1</sup> H-NMR, <sup>13</sup> C-NMR spectra..... | S 2-26 |
|------------------------------------------------------|--------|

#### Additional Experiments for Moisture-Sensitivity

| <div style="display: flex; align-items: center; justify-content: center;"> <div style="text-align: center;"> 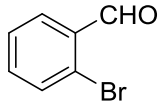 <p><b>1a</b> (0.5 mmol scale)</p> </div> <div style="margin: 0 20px; text-align: center;"> <p>dendritic Cu (0.5 mmol)<br/>malonamide (1.0 mmol)<br/>piperidine (0.25 mmol)</p> <hr style="width: 100%;"/> <p>DMA (1.5 mL), 110 °C, 2 d</p> </div> <div style="text-align: center;">  <p><b>3a</b></p> </div> </div> |                    |
|----------------------------------------------------------------------------------------------------------------------------------------------------------------------------------------------------------------------------------------------------------------------------------------------------------------------------------------------------------------------------------------------------------------------------------------------------------------------------------------------------------------------------------------------------------------------------------------------------------|--------------------|
| addition of water                                                                                                                                                                                                                                                                                                                                                                                                                                                                                                                                                                                        | Yield <sup>a</sup> |
| 1 equiv (0.5 mmol)                                                                                                                                                                                                                                                                                                                                                                                                                                                                                                                                                                                       | 56%                |
| 5 equiv (2.5 mmol)                                                                                                                                                                                                                                                                                                                                                                                                                                                                                                                                                                                       | 51%                |
| 10 equiv (5.0 mmol)                                                                                                                                                                                                                                                                                                                                                                                                                                                                                                                                                                                      | 44%                |

<sup>a</sup>determined by <sup>1</sup>H NMR using 1,3,5-trimethoxybenzene as the internal standard

# 1. $^1\text{H}$ -NMR, $^{13}\text{C}$ -NMR

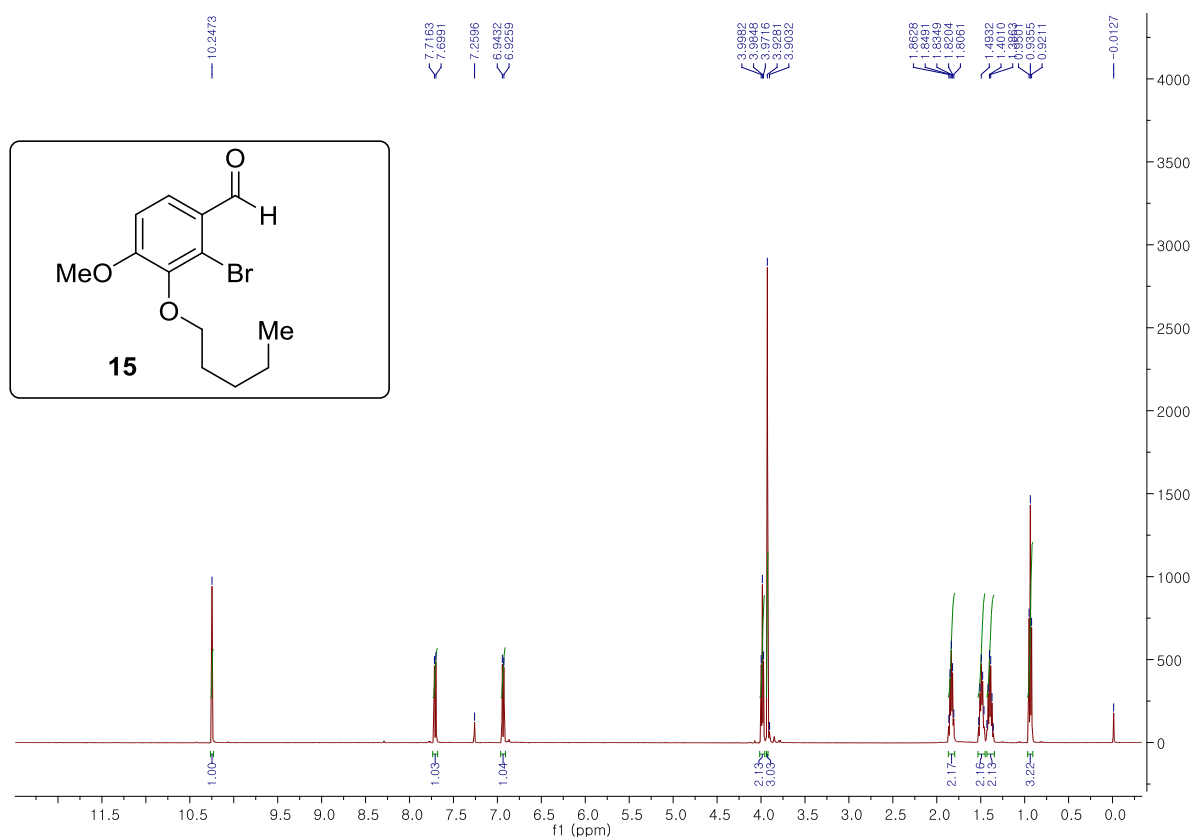

application-pentyl-sm-20180709-CARBON  
application-pentyl-sm-20180709-CARBON

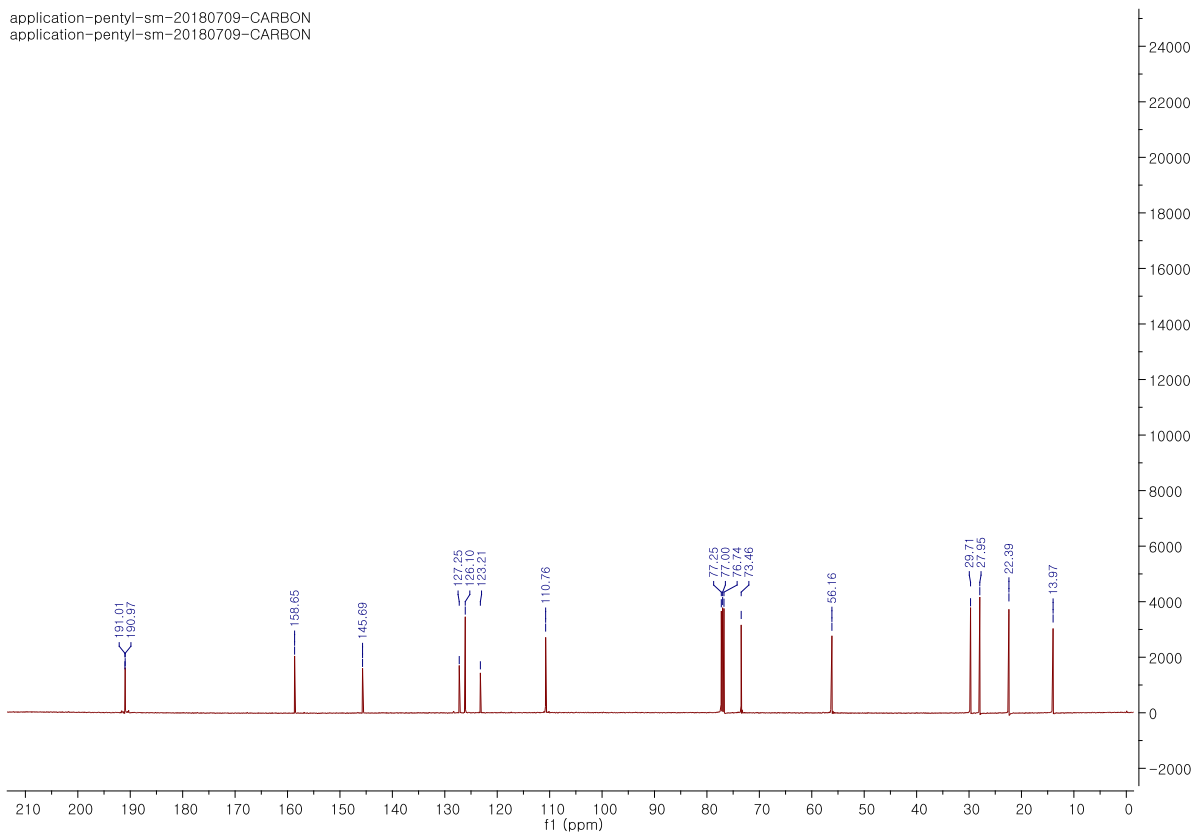

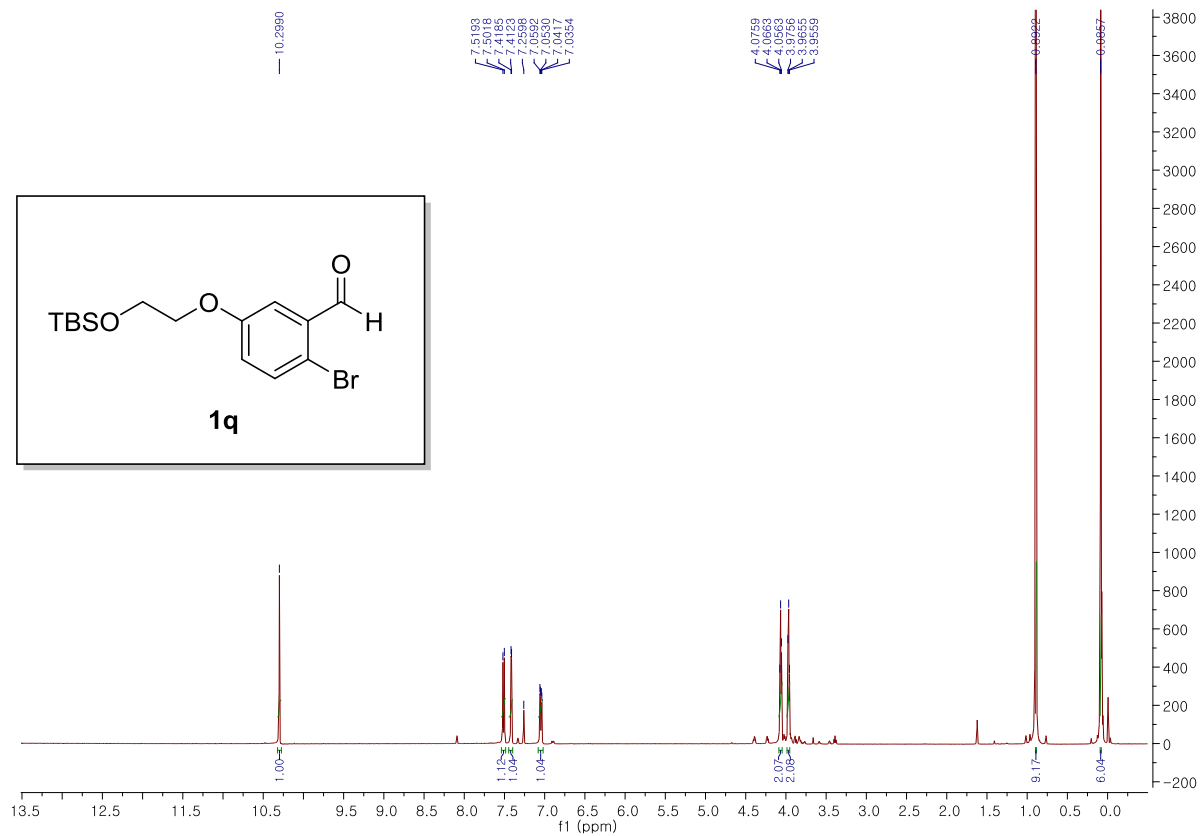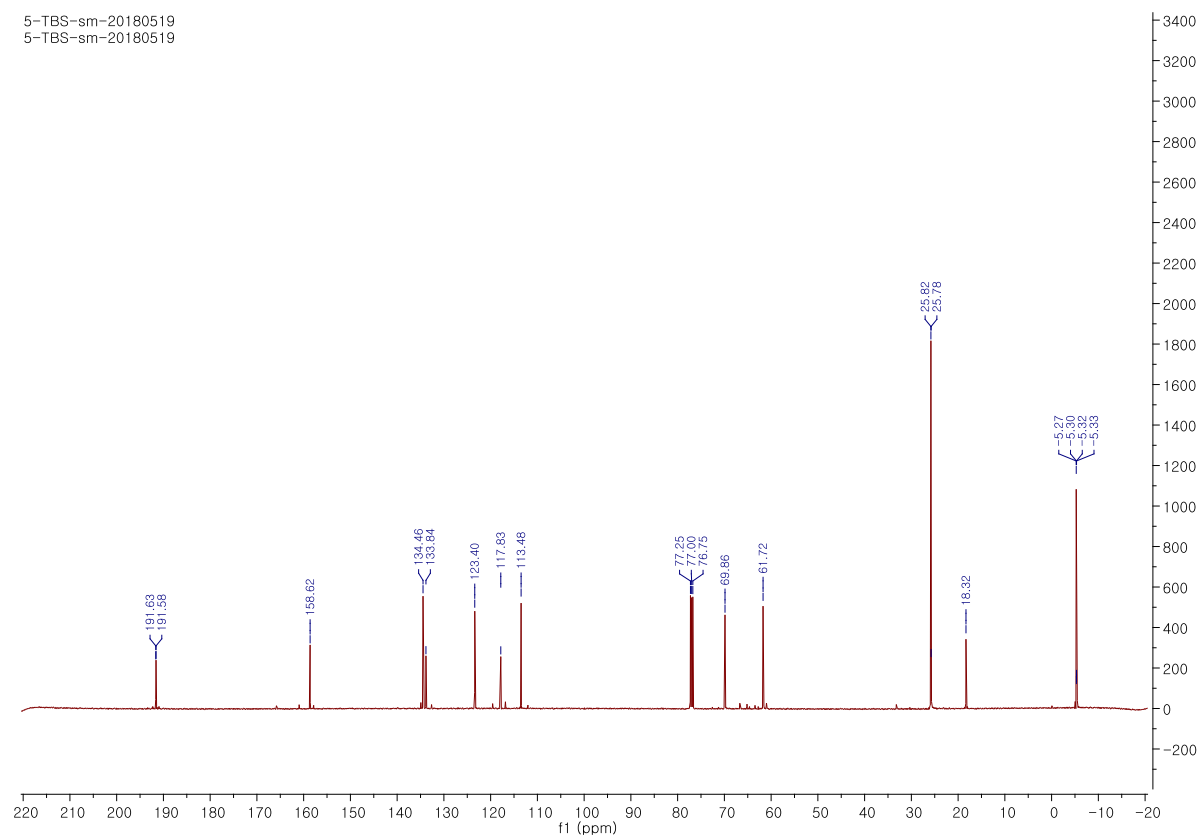

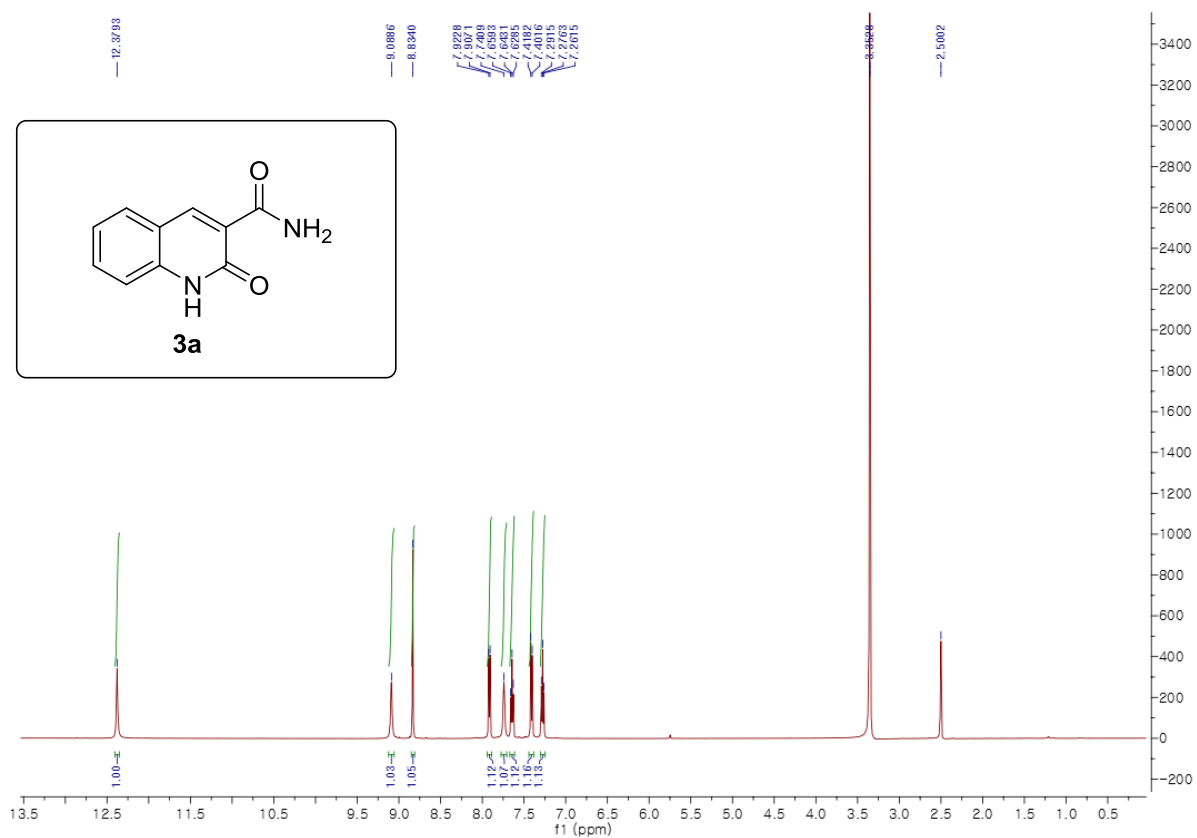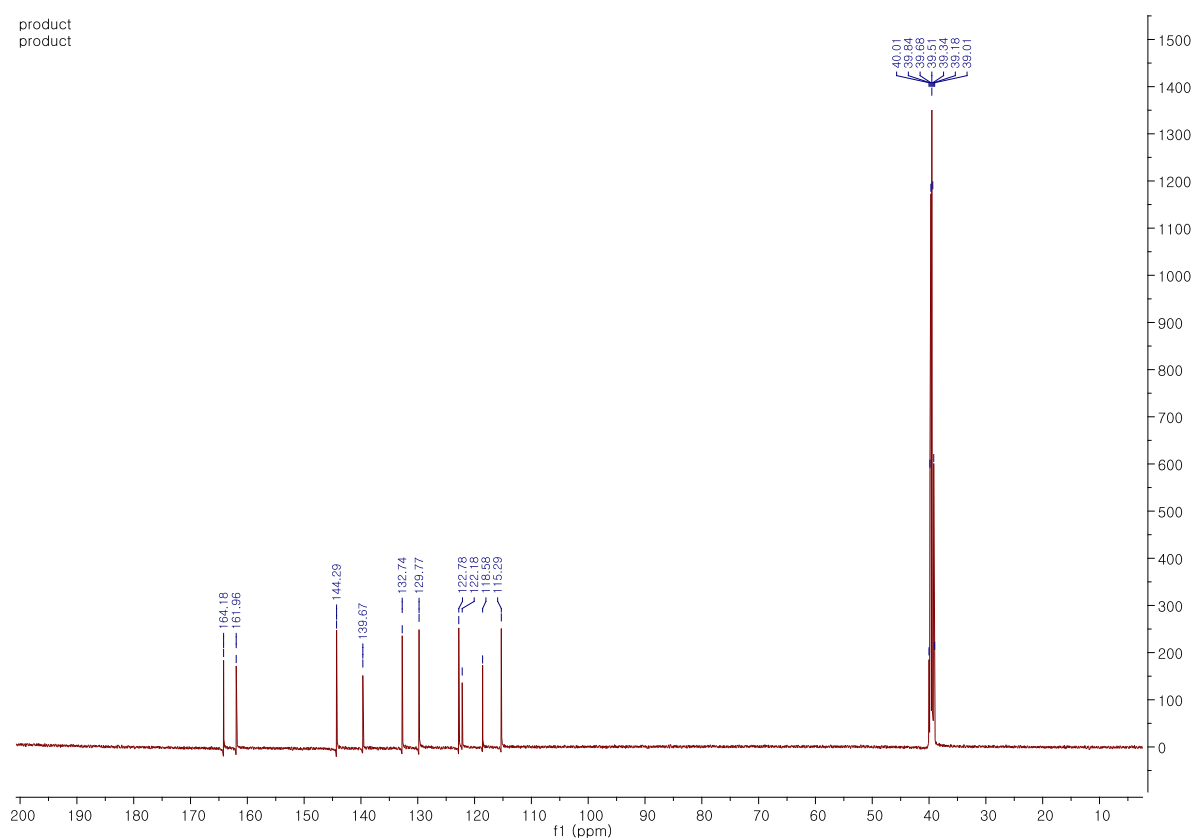

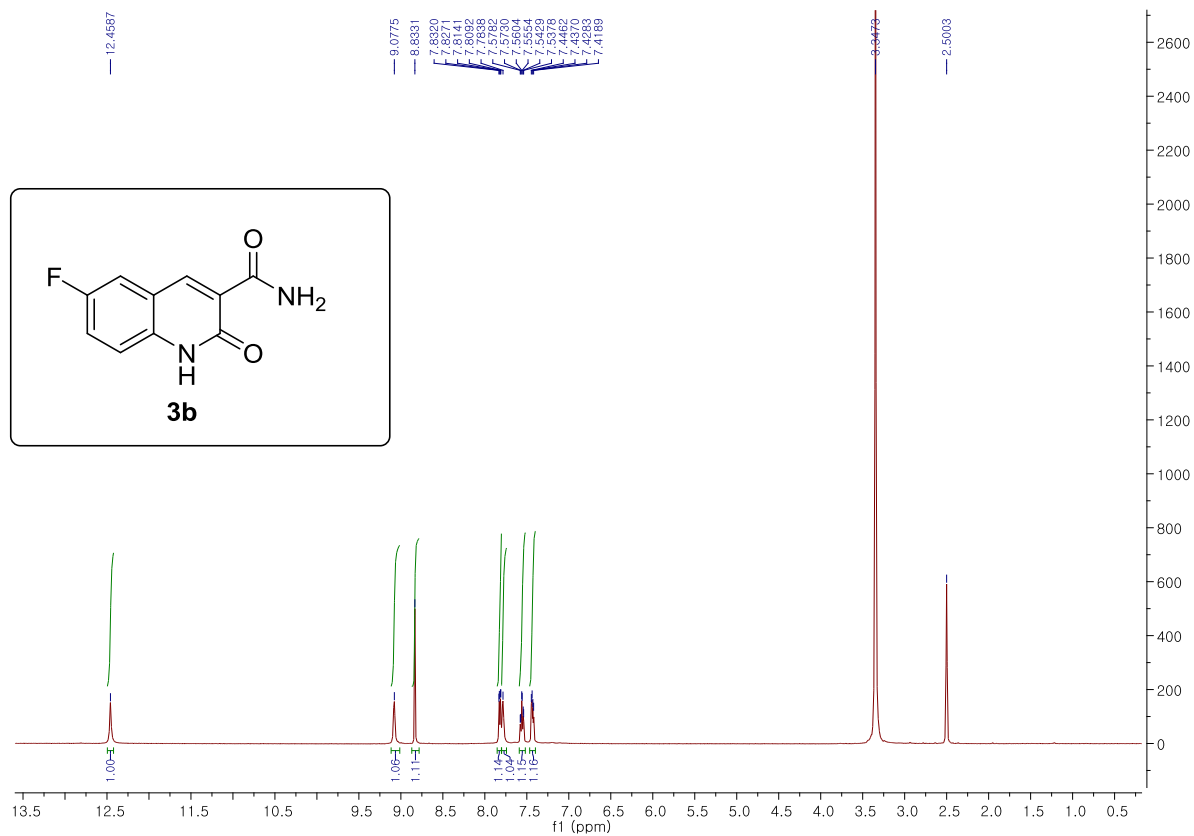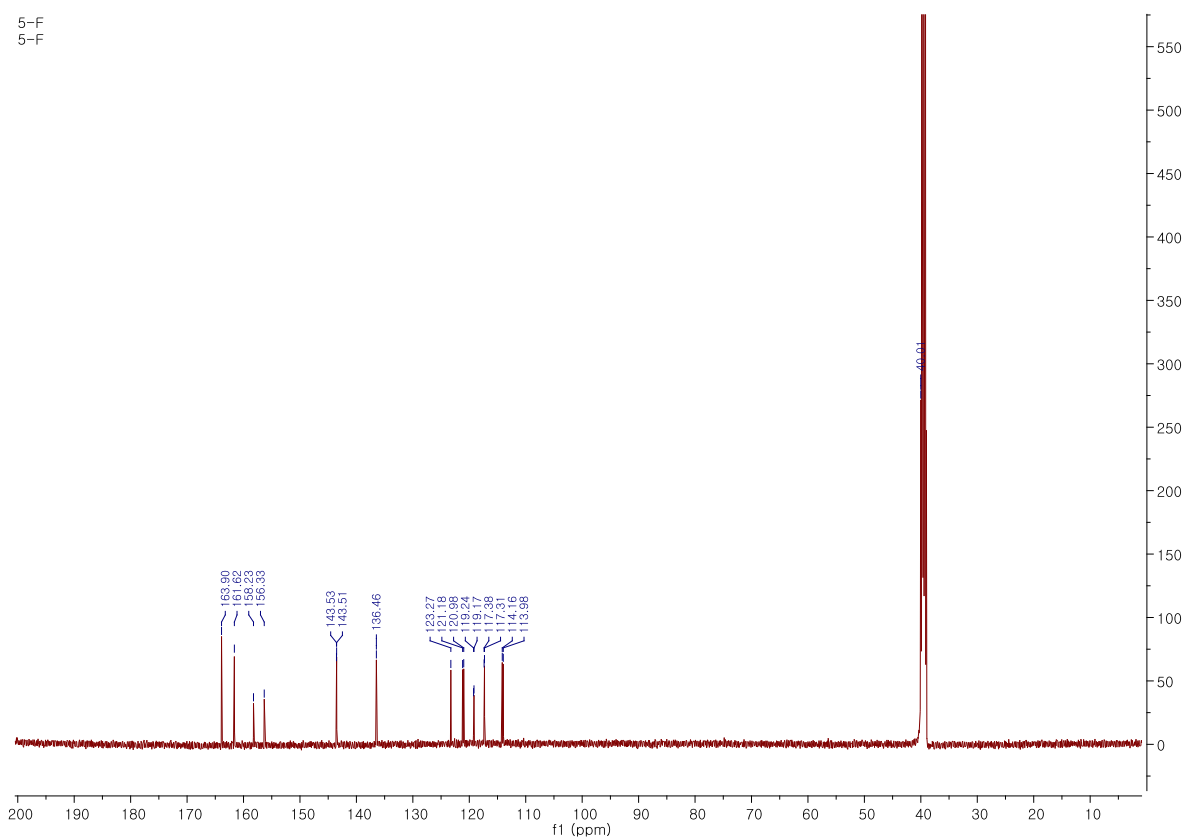

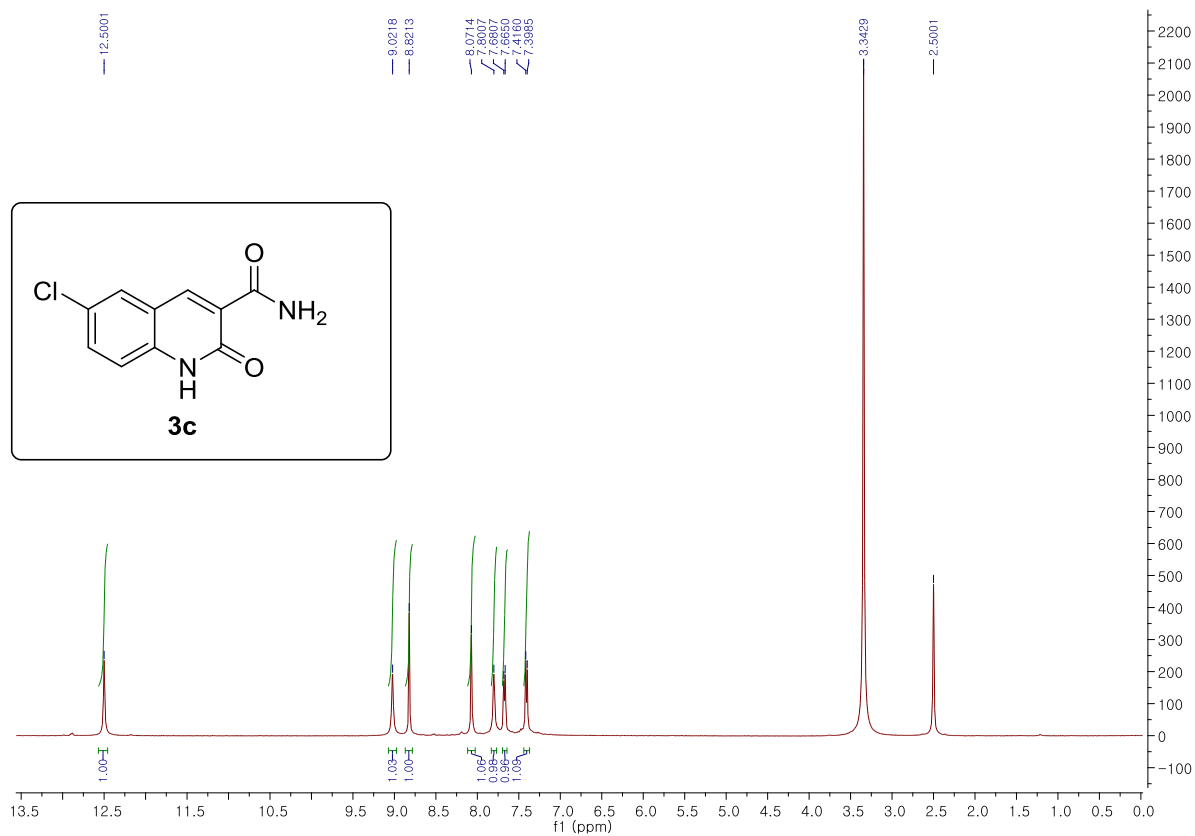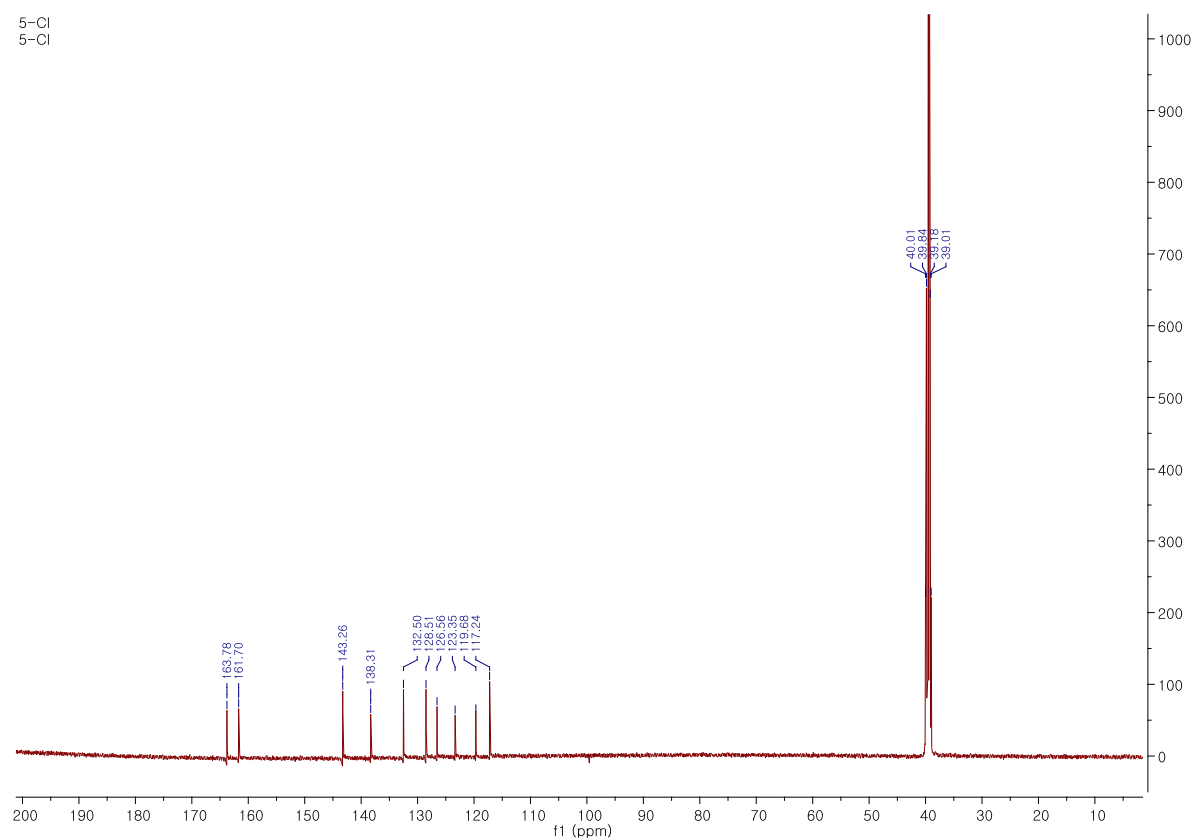

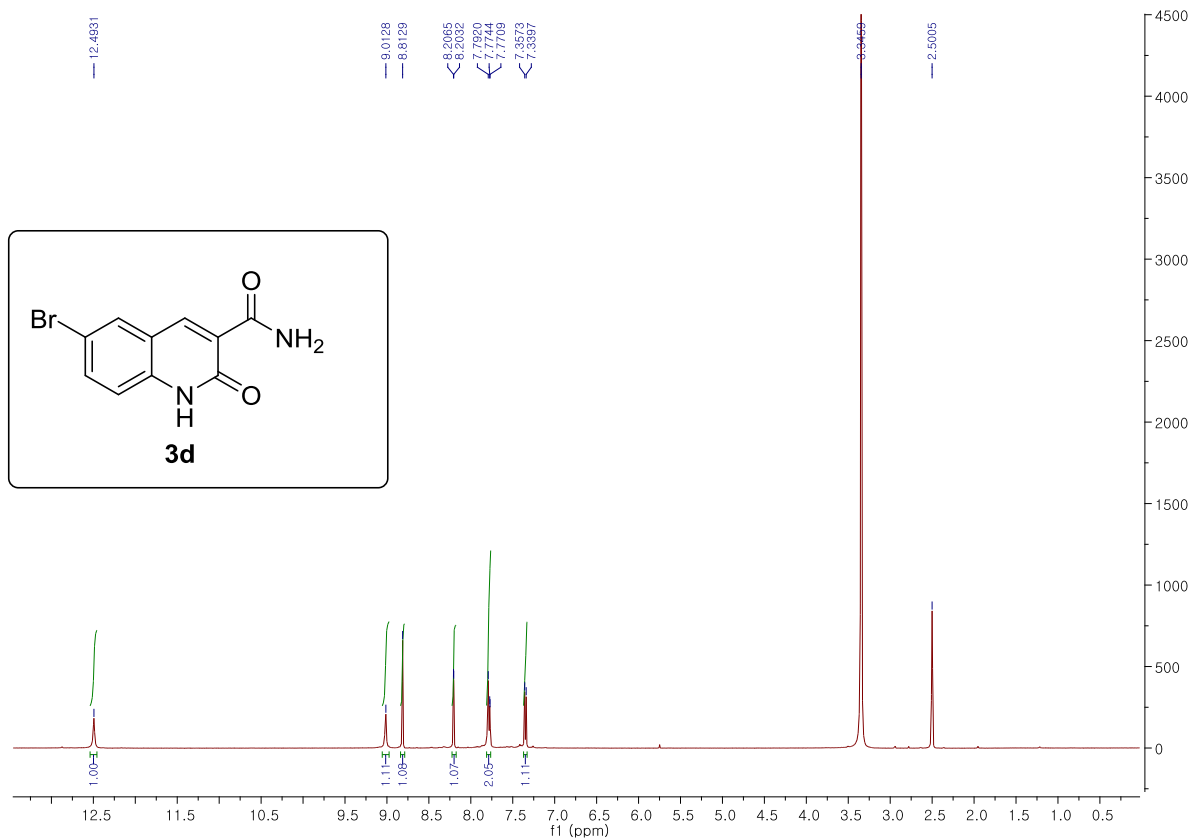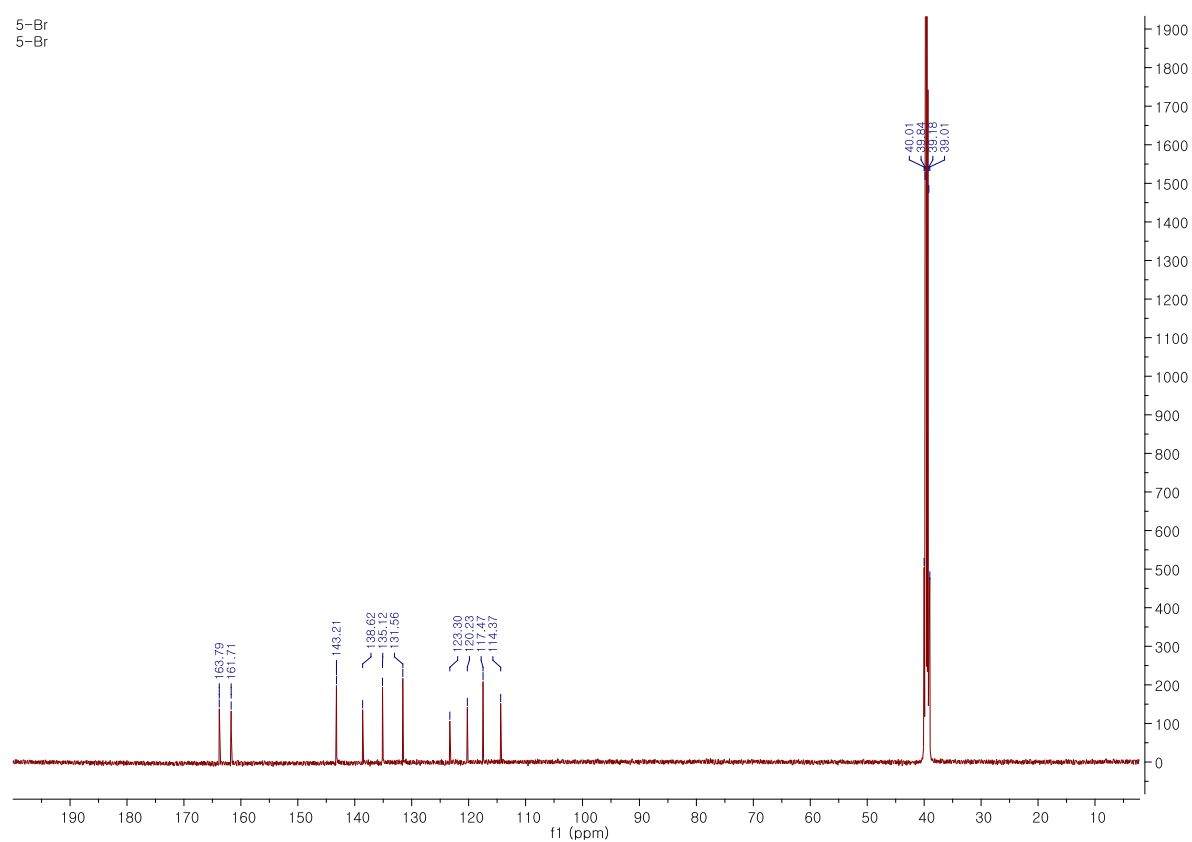

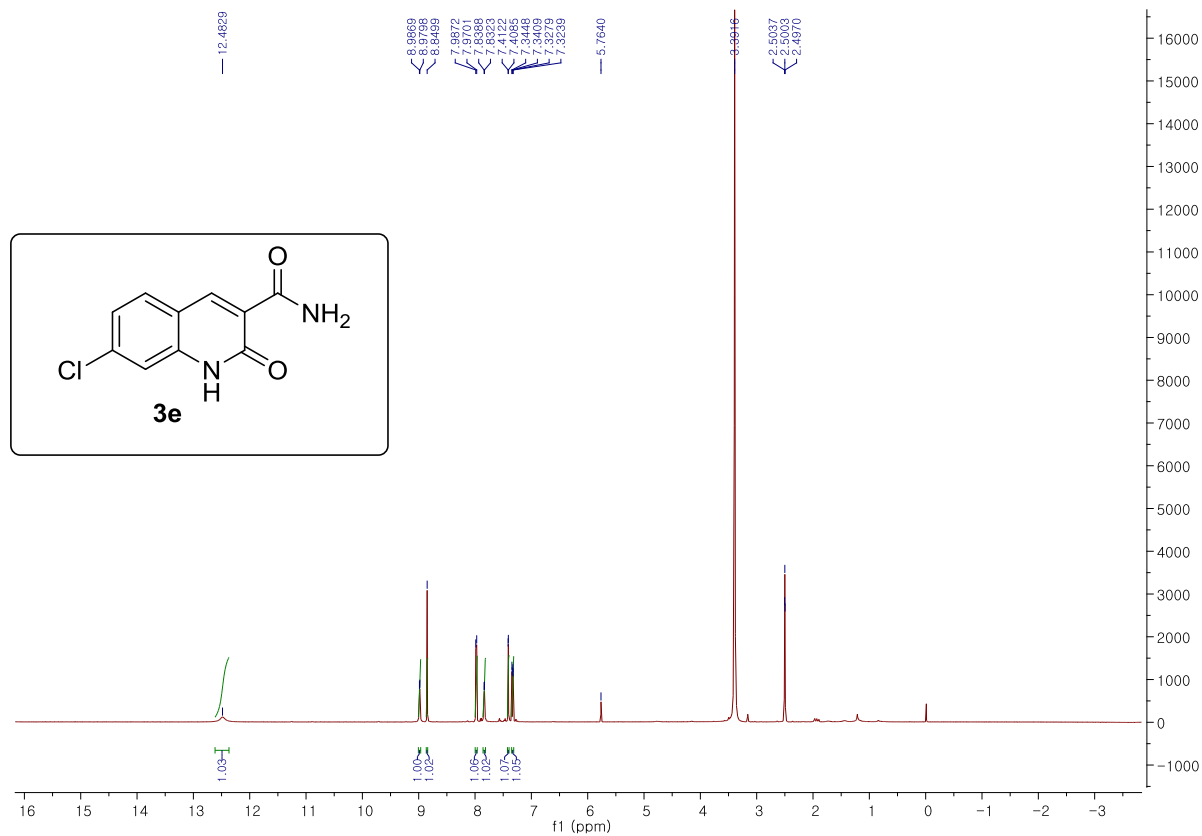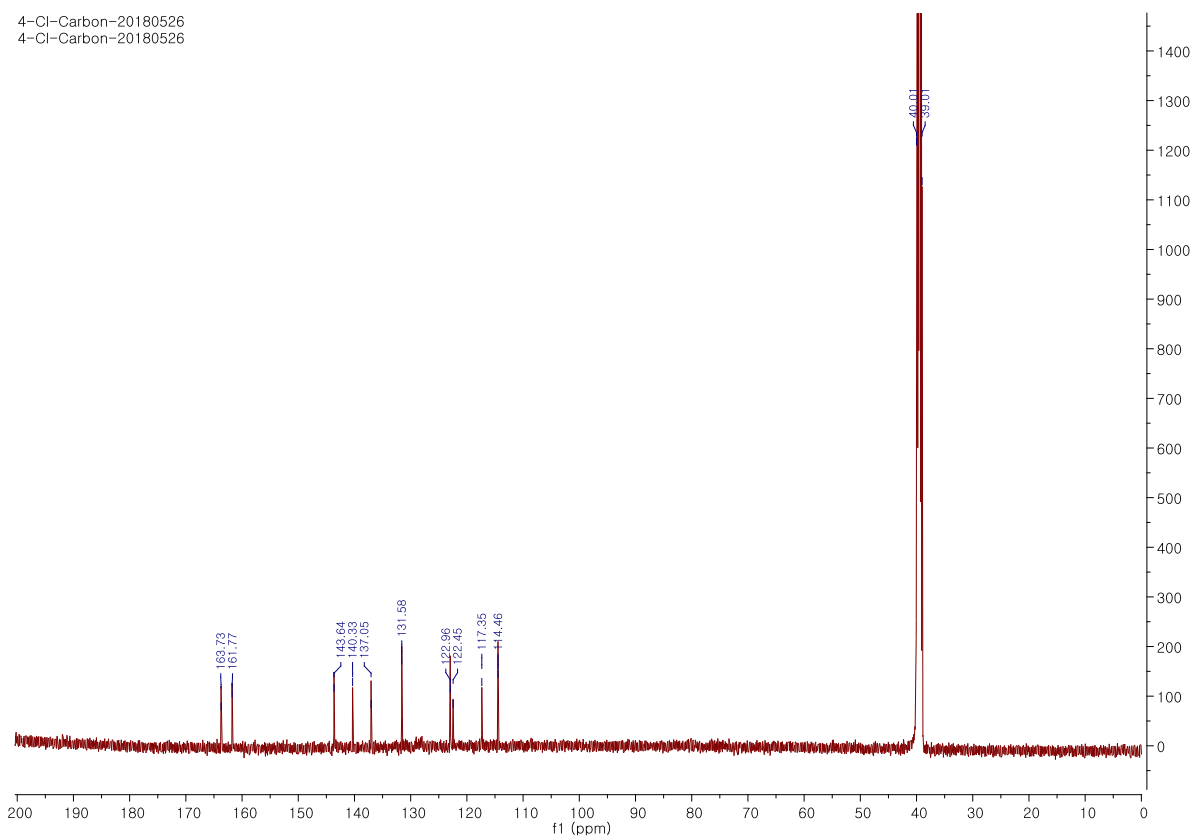



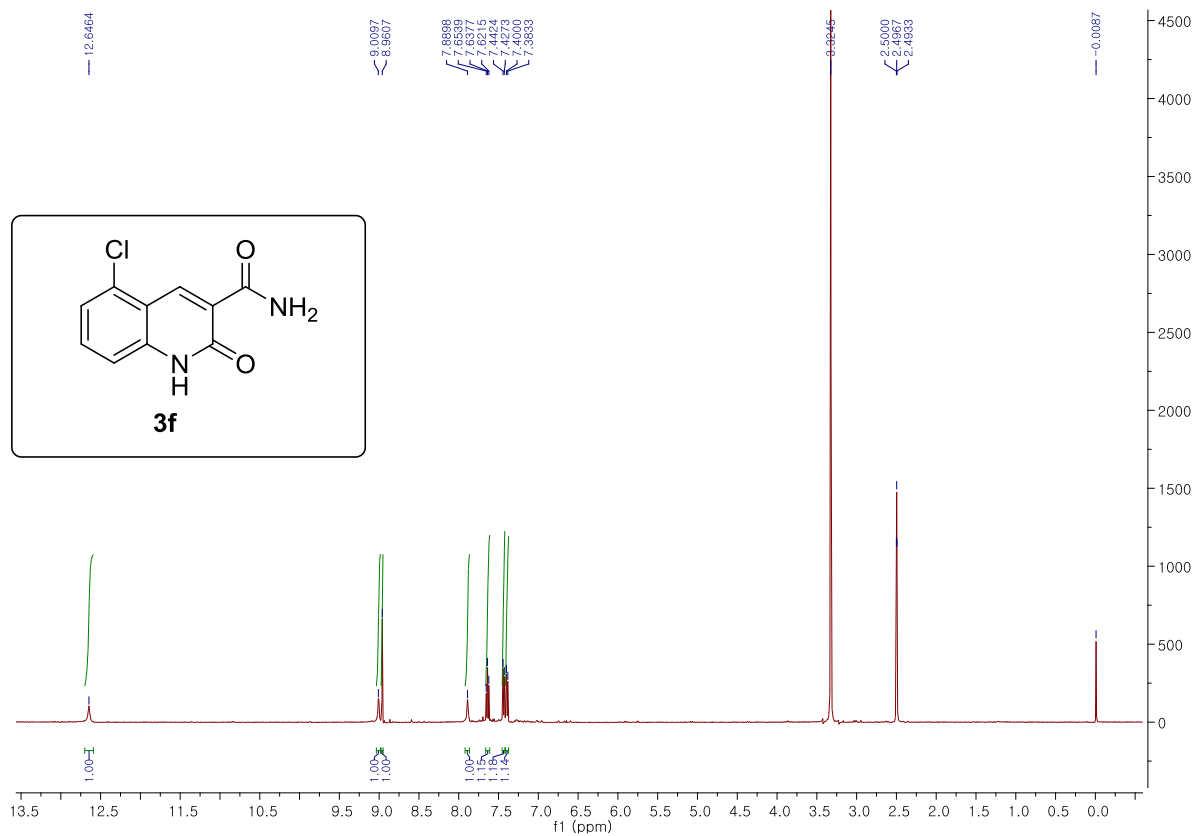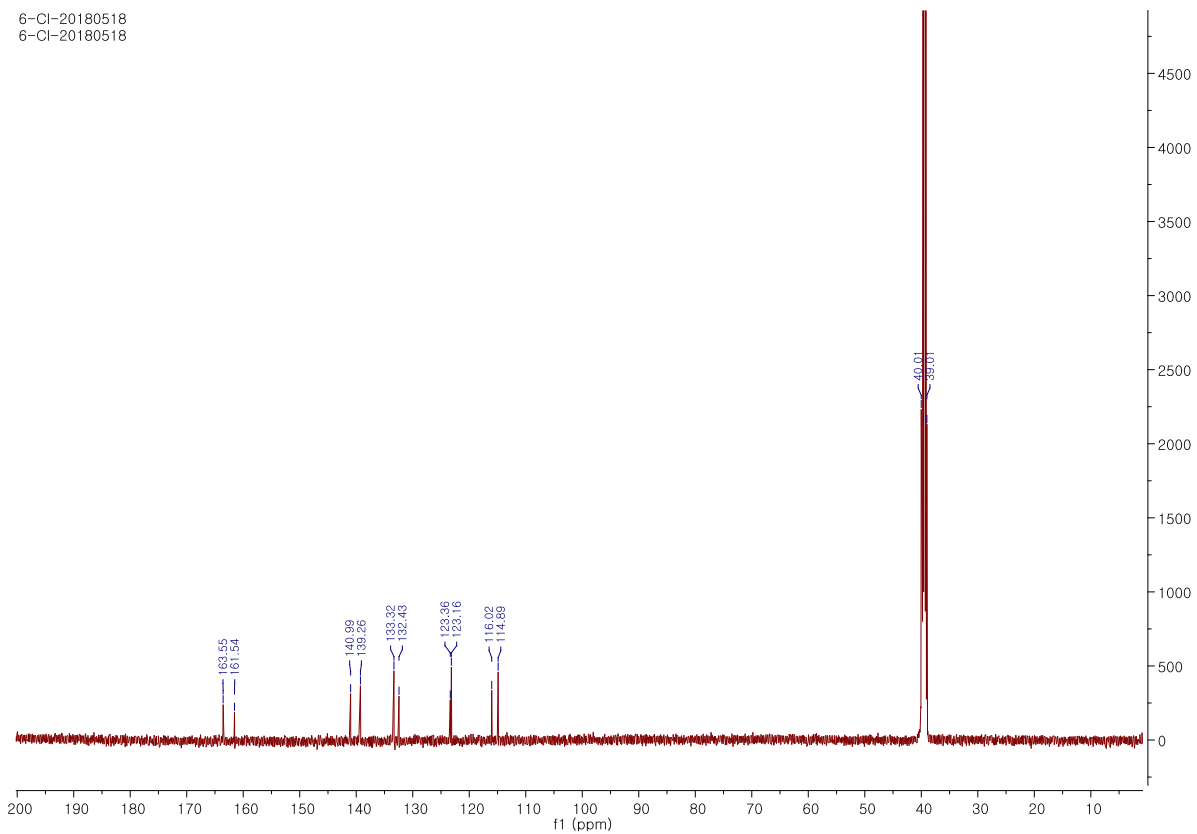

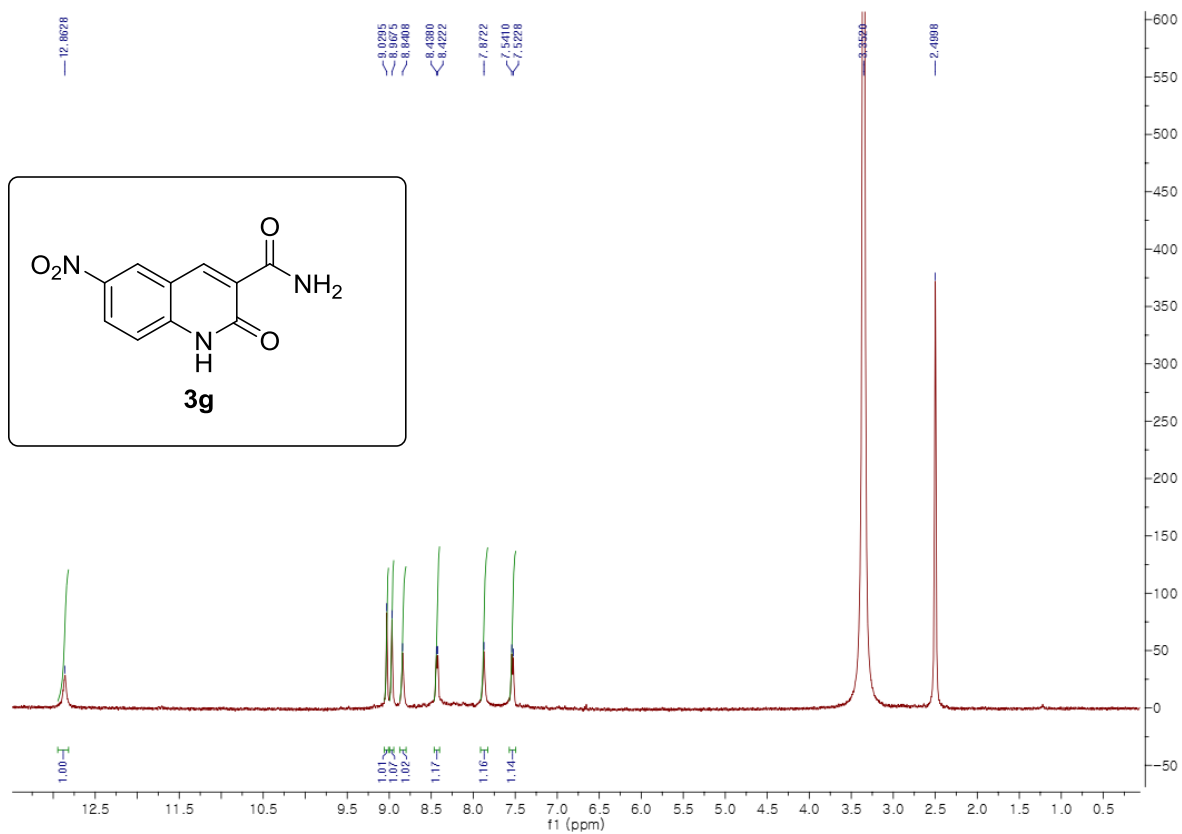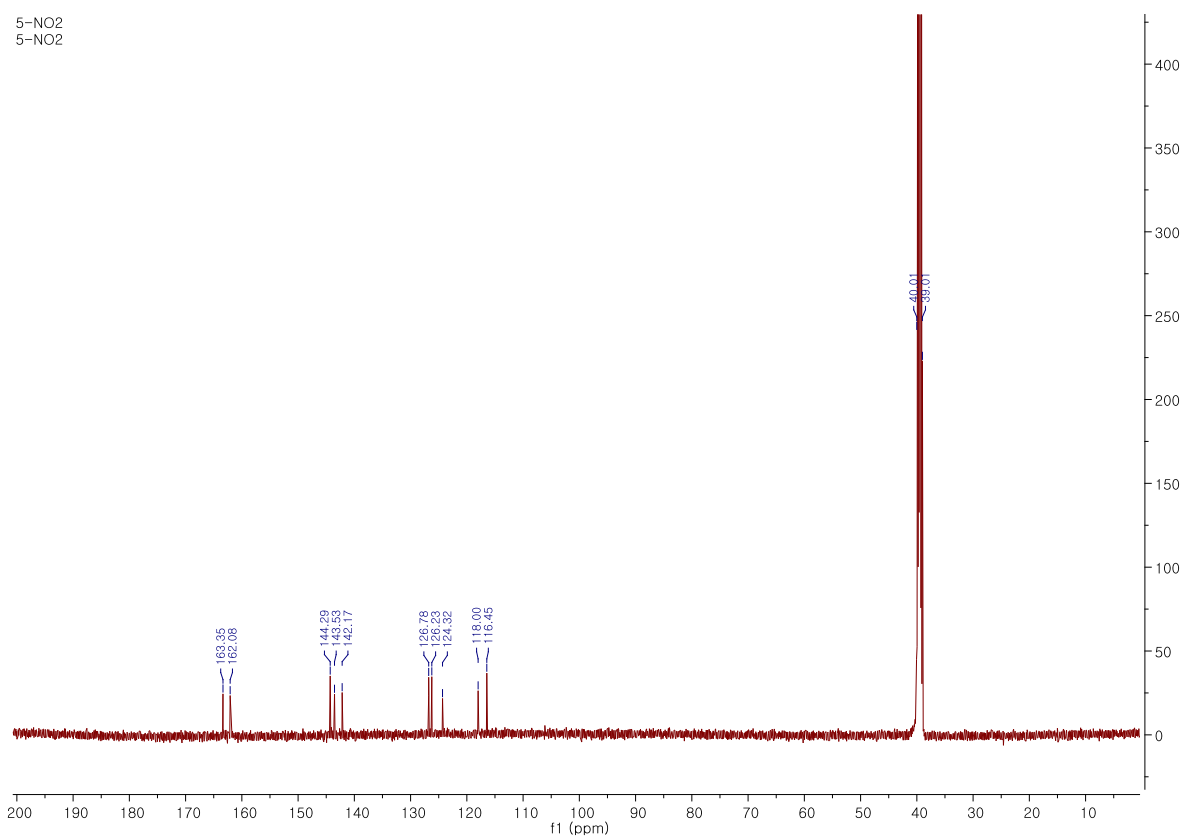

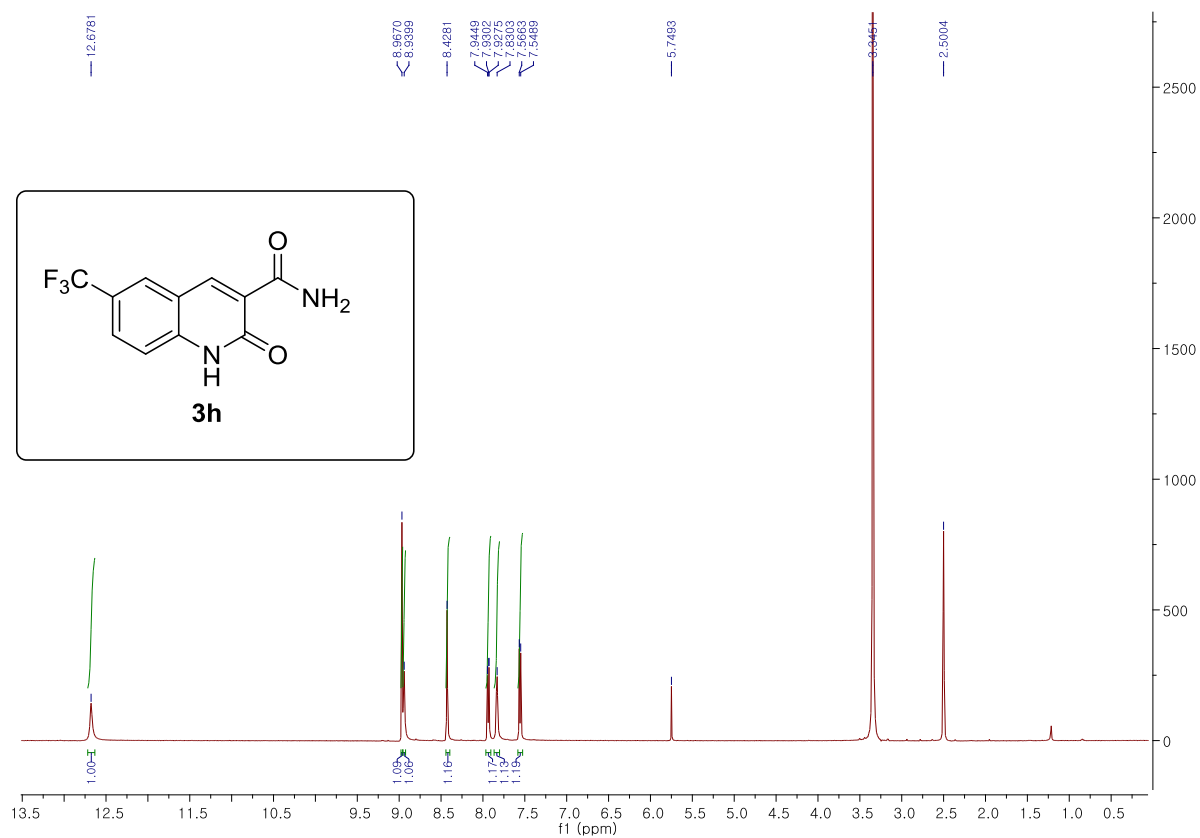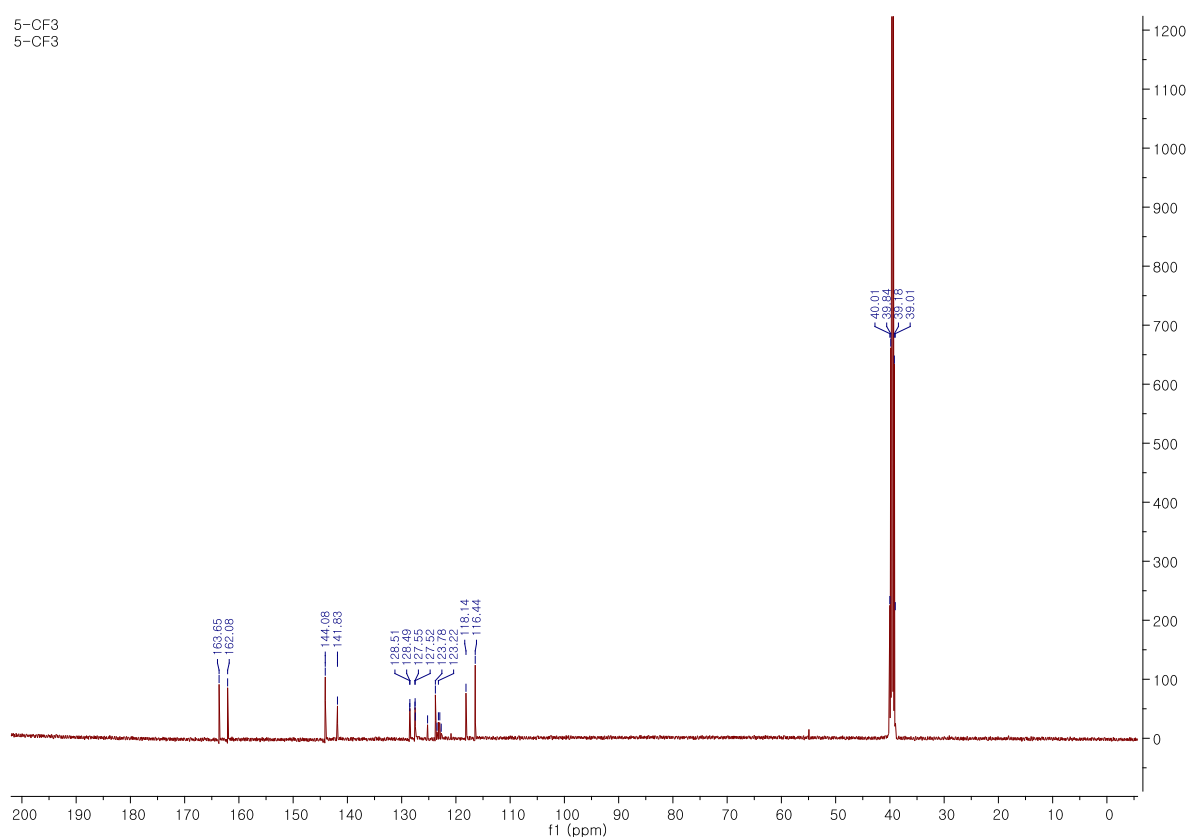

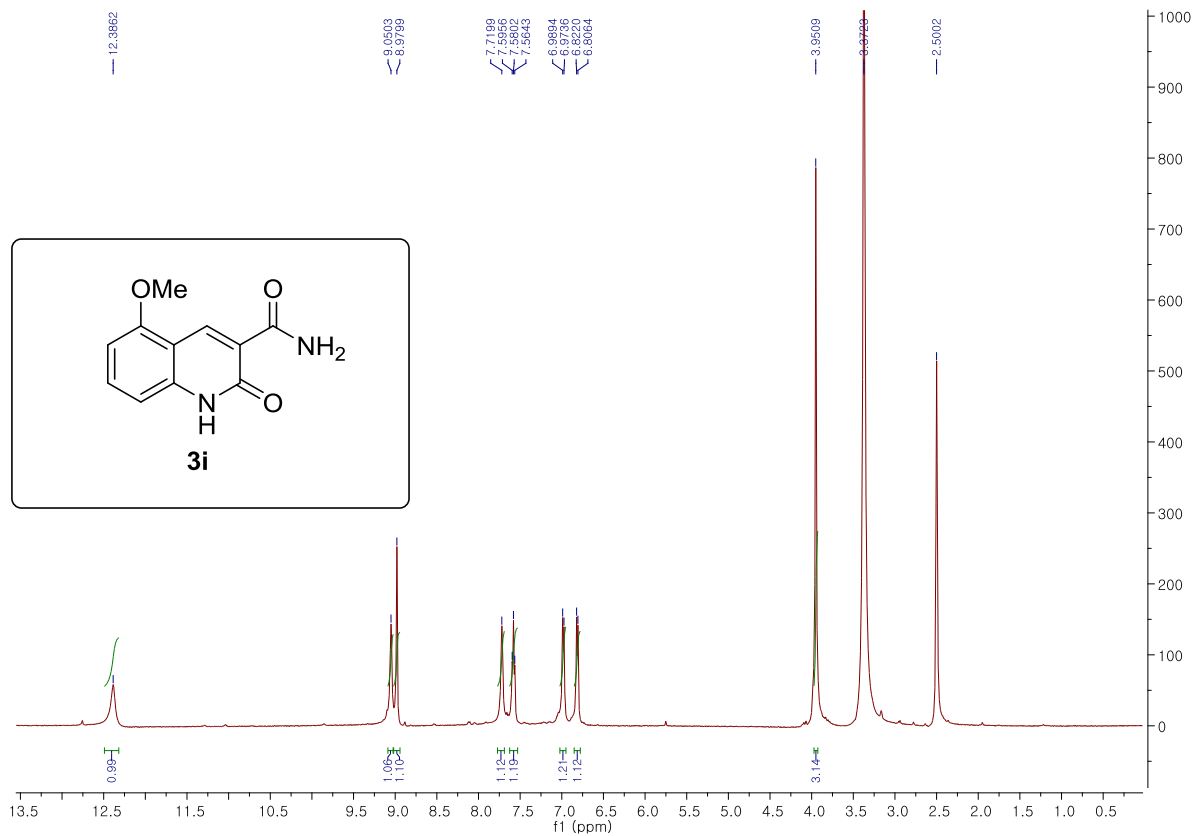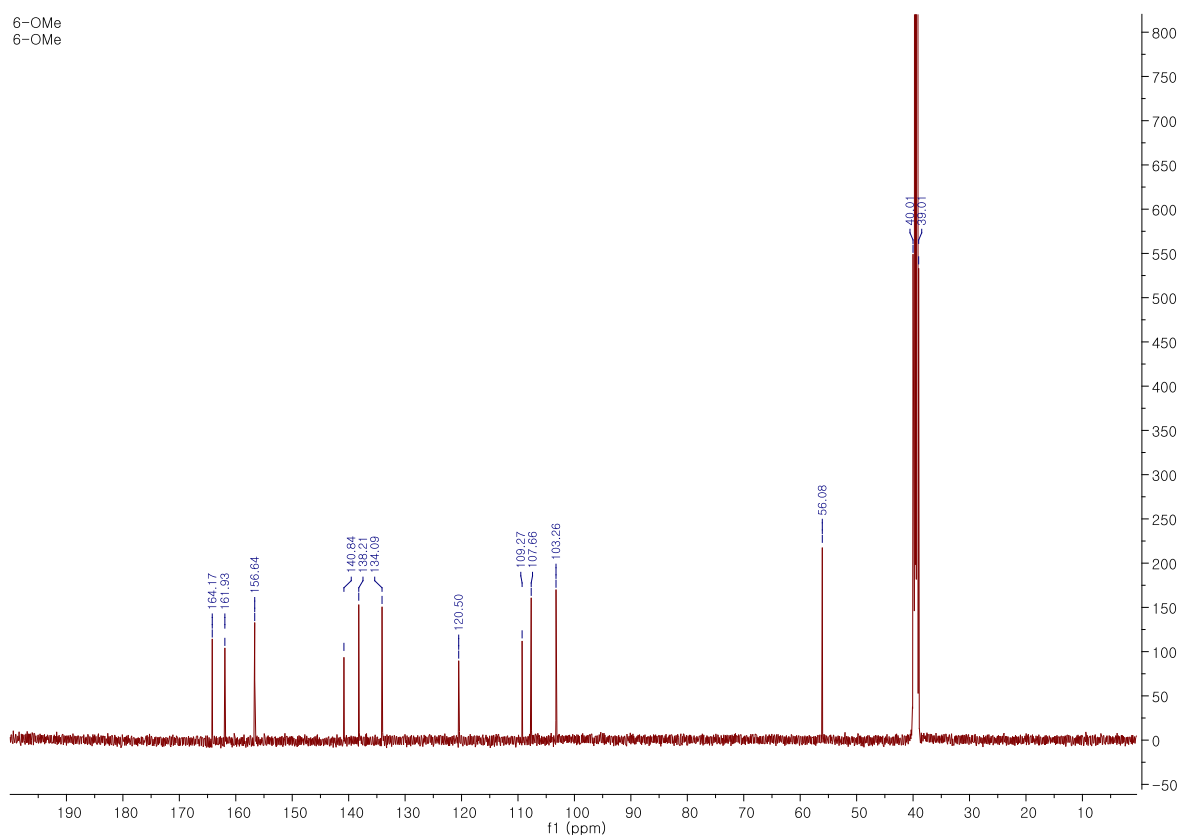

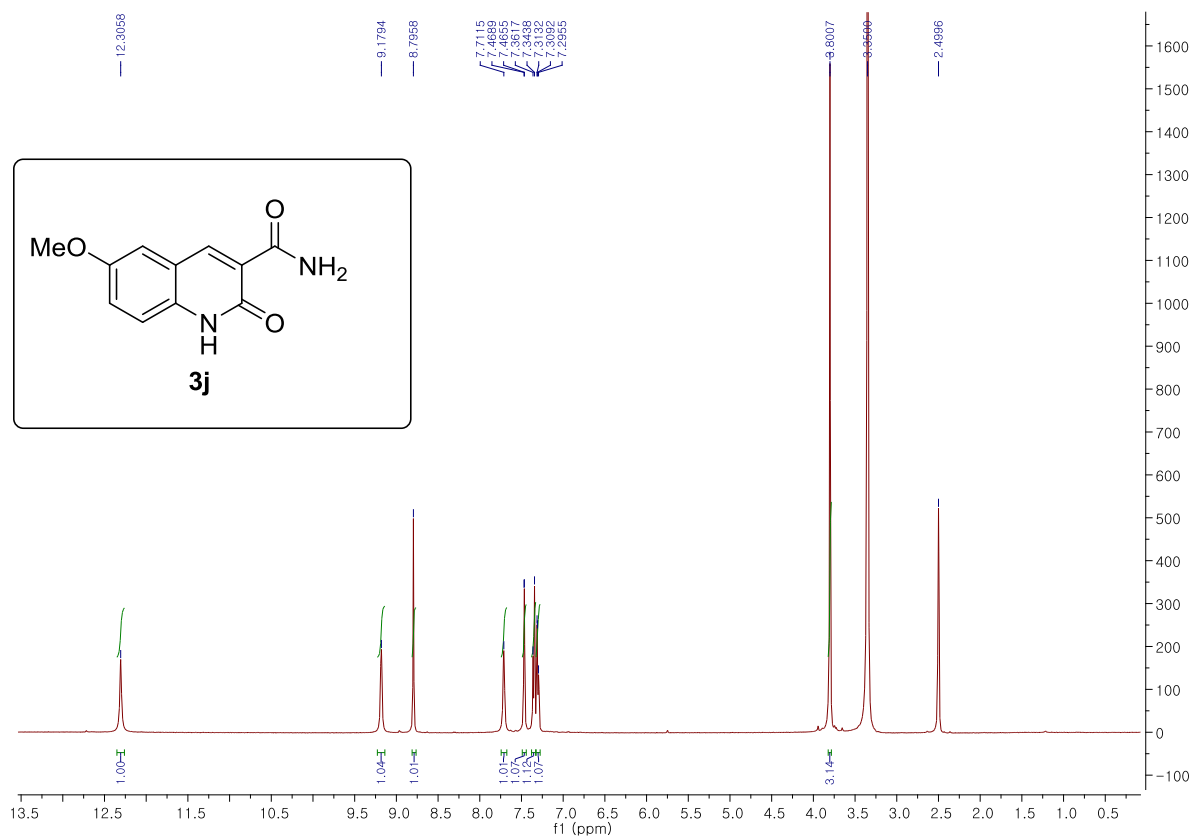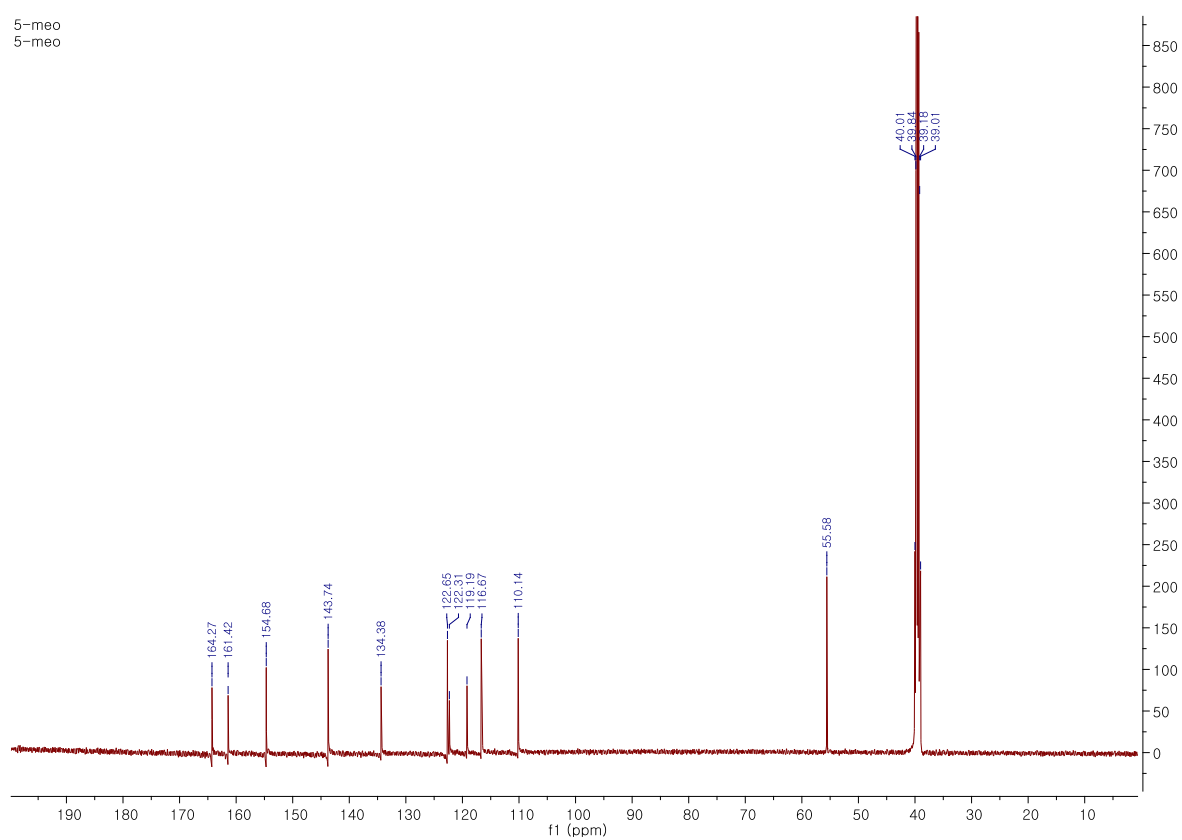

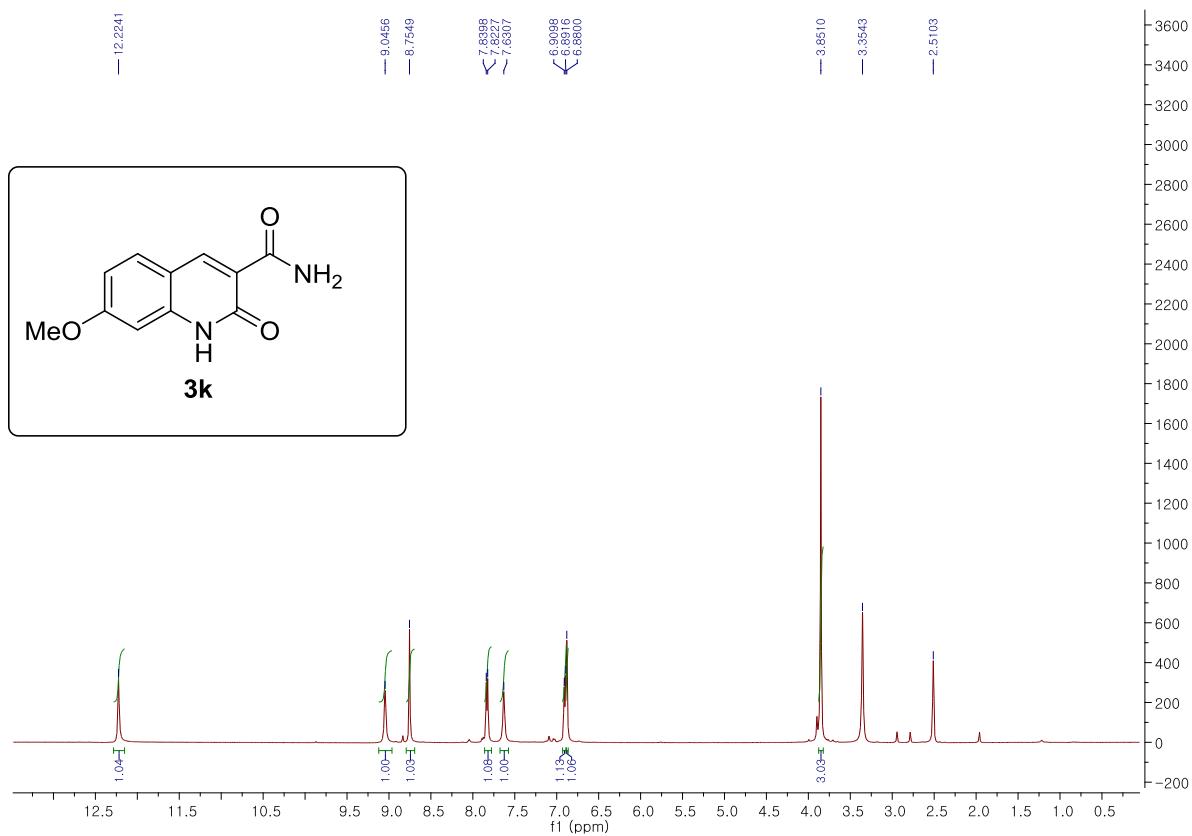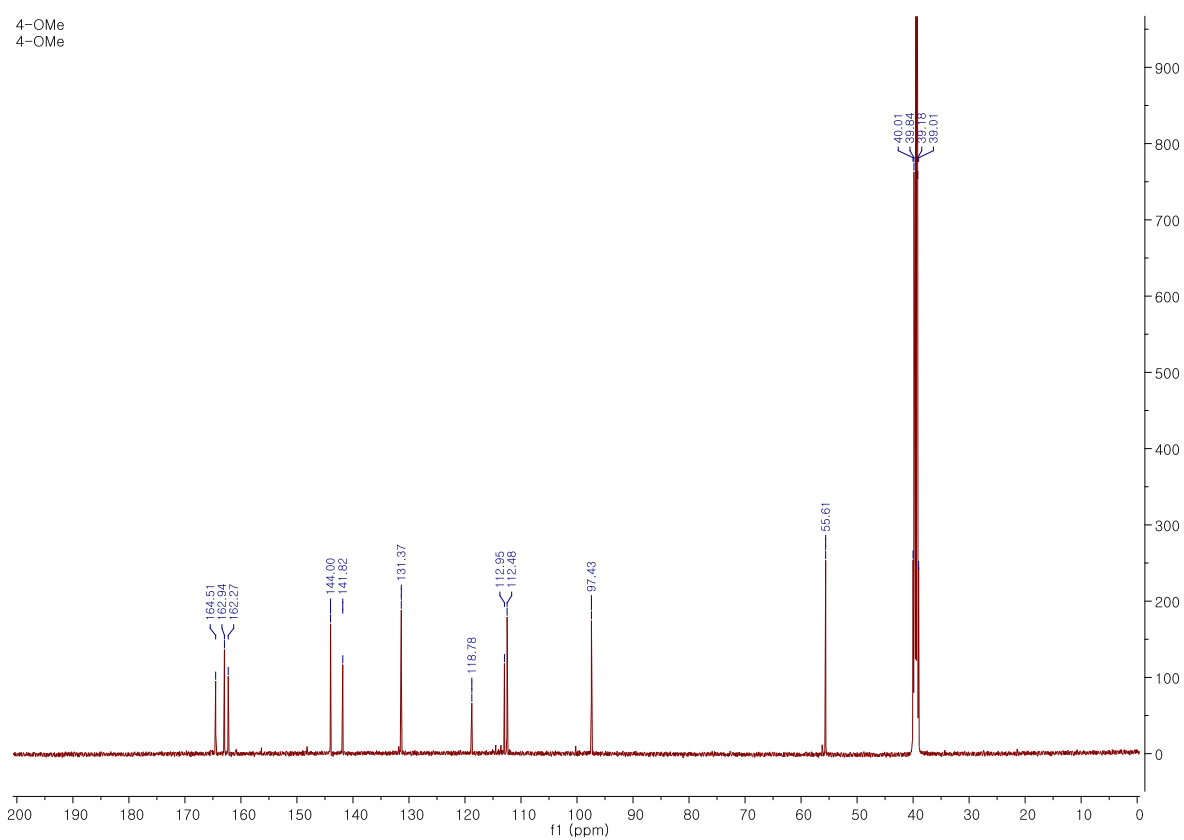

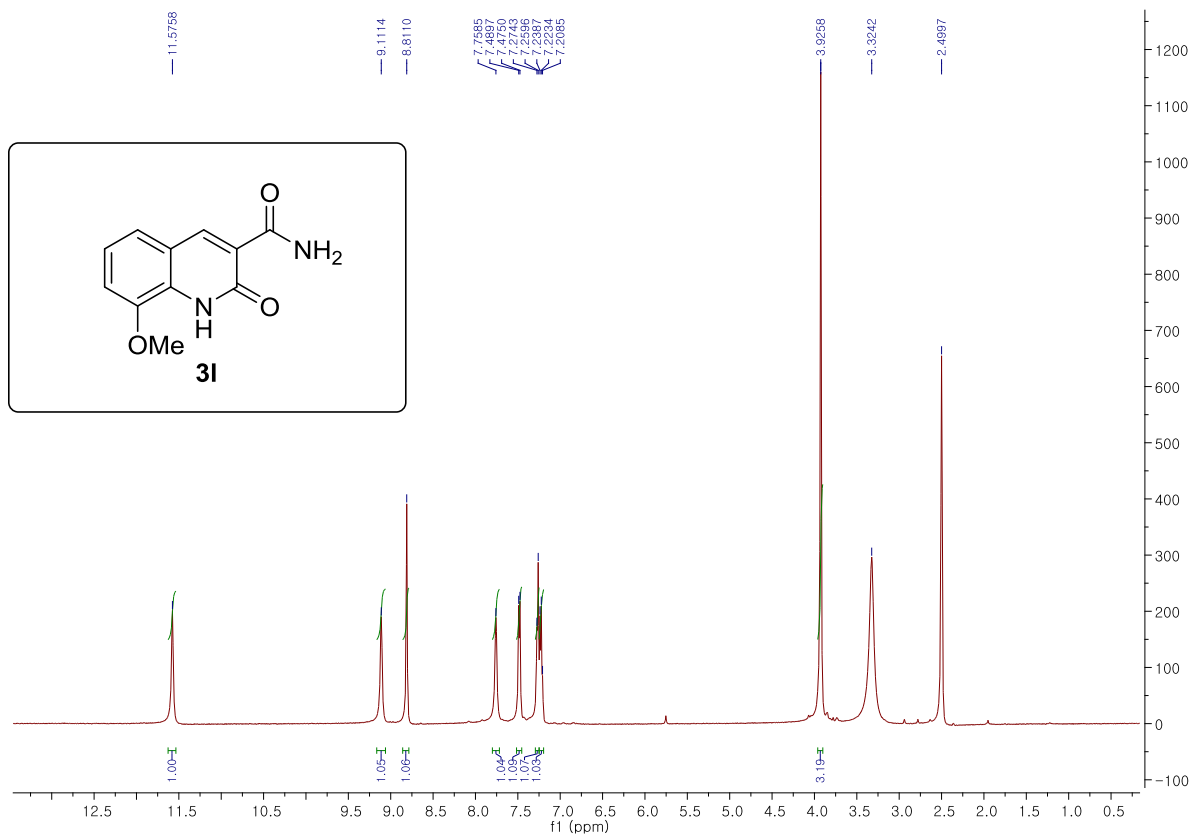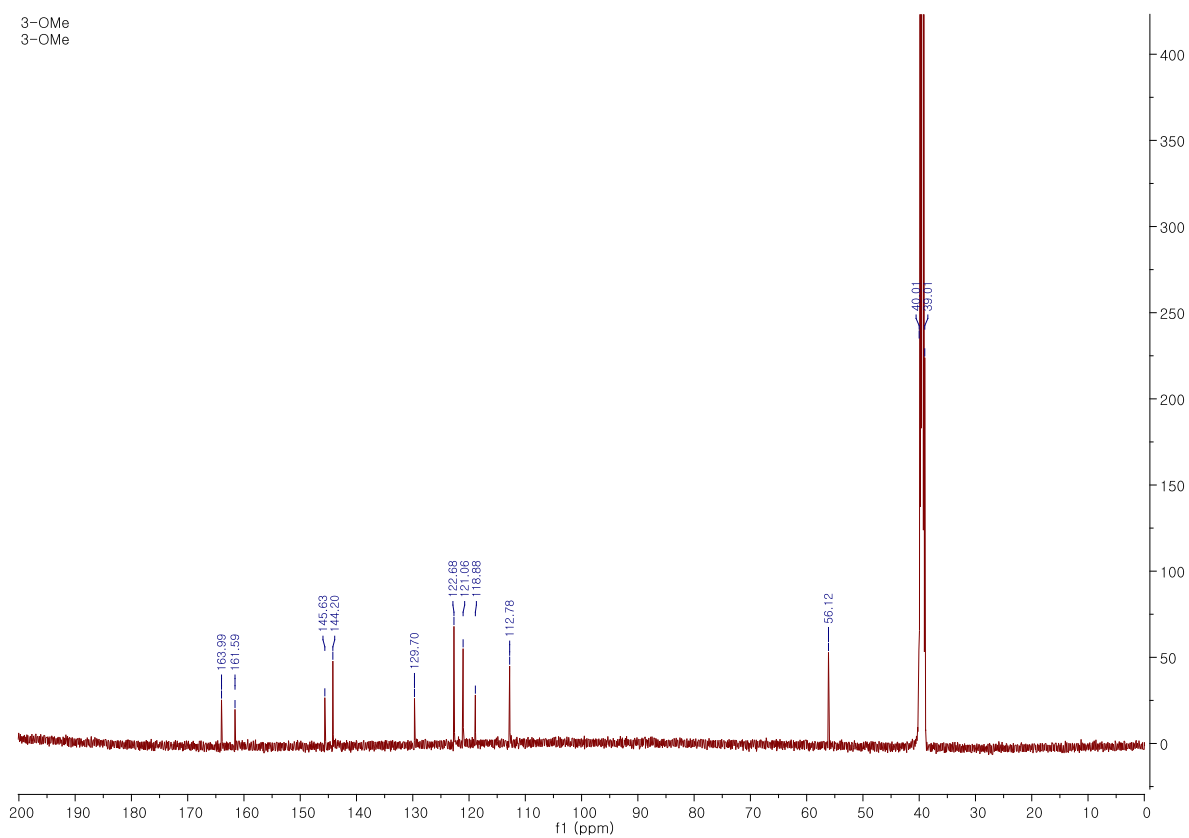

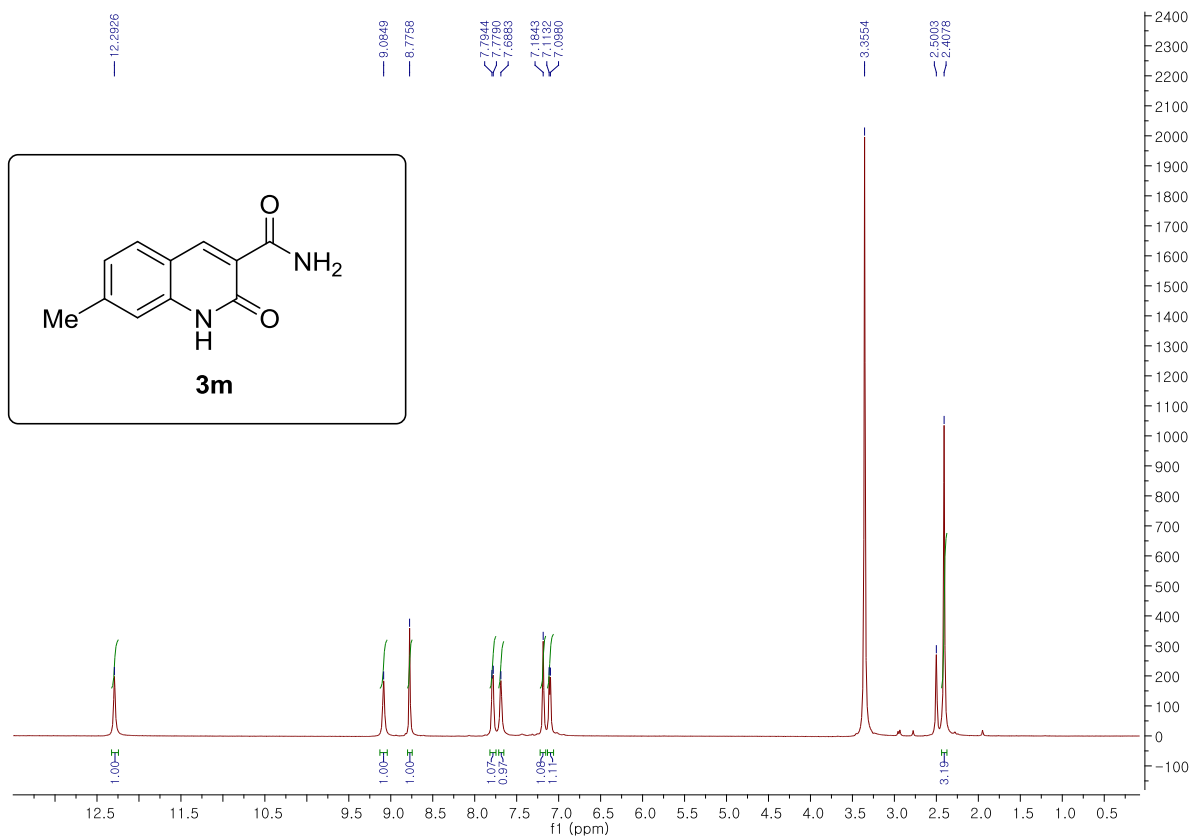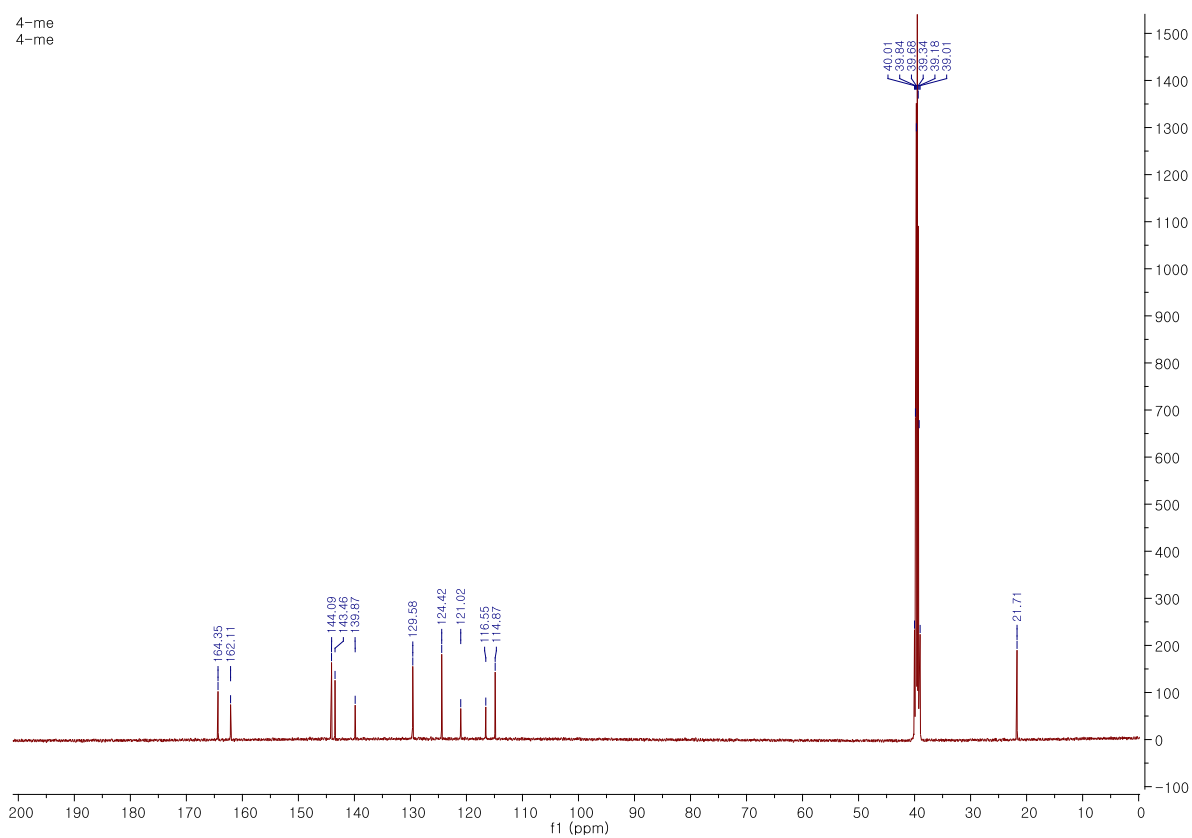



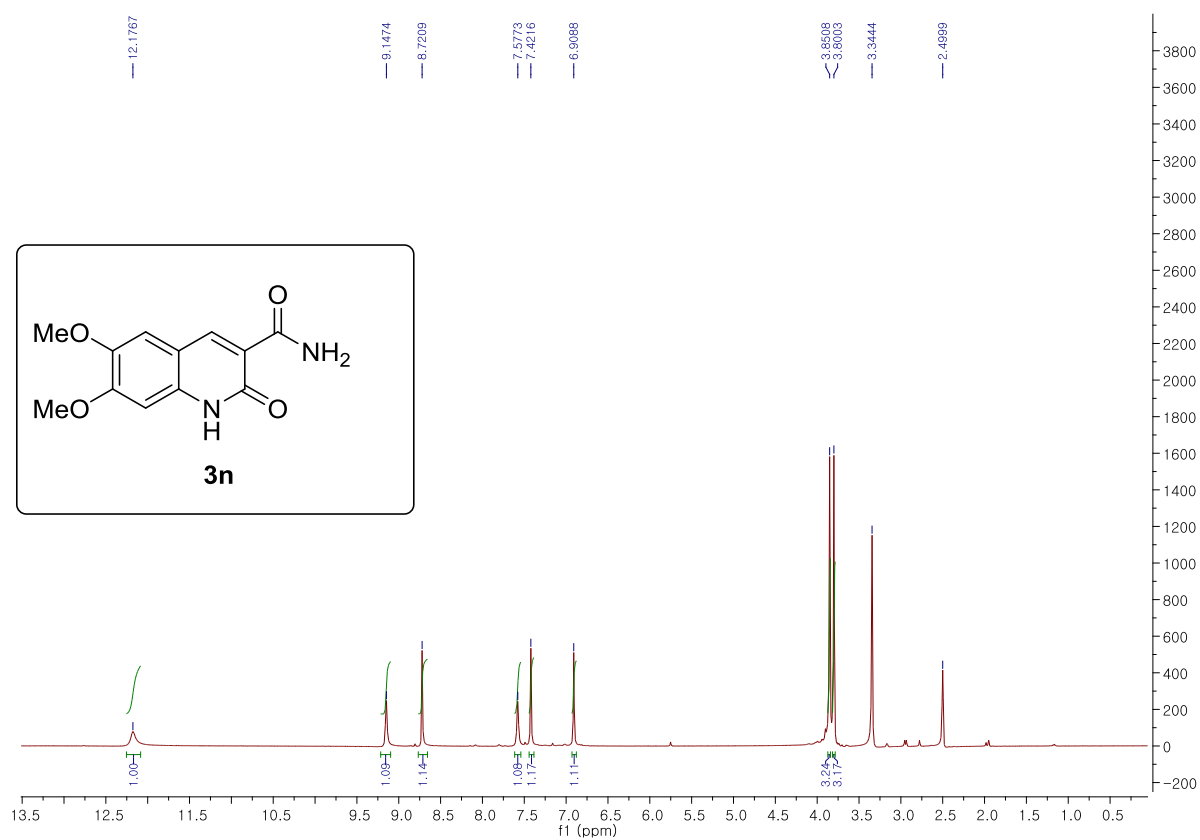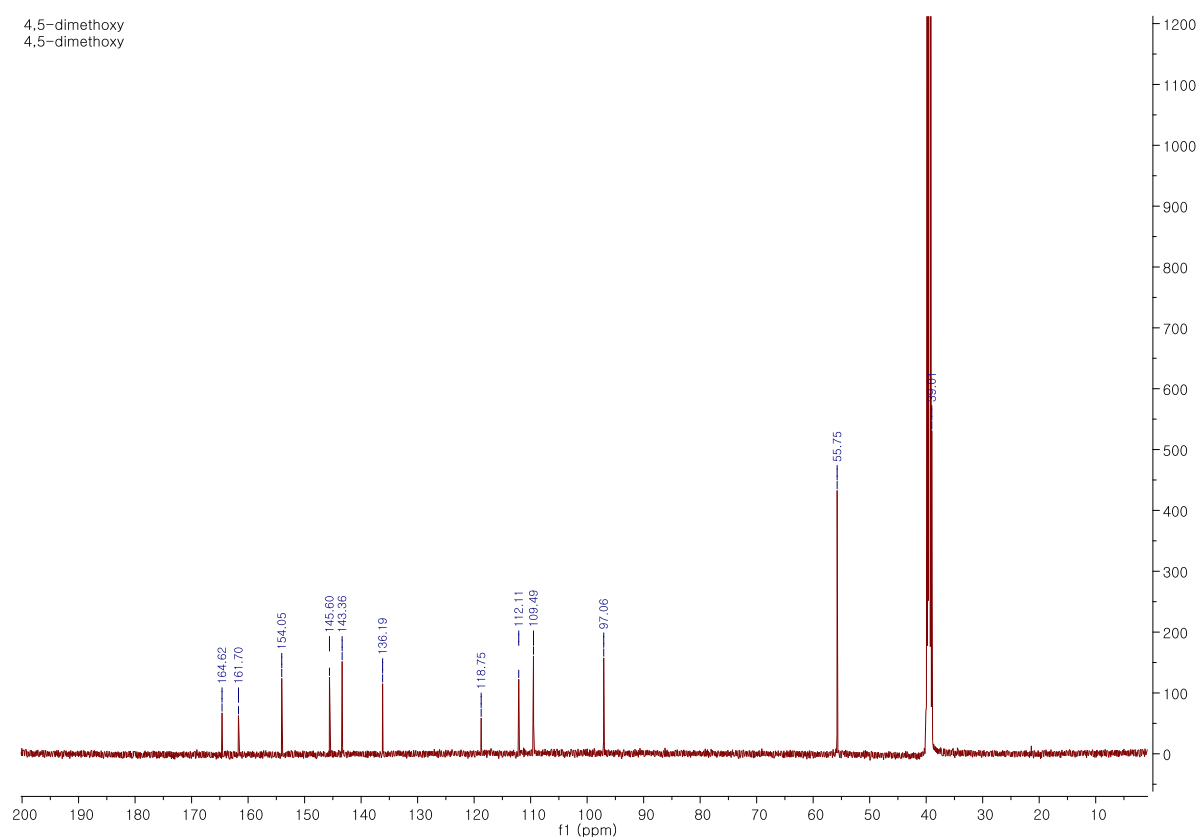

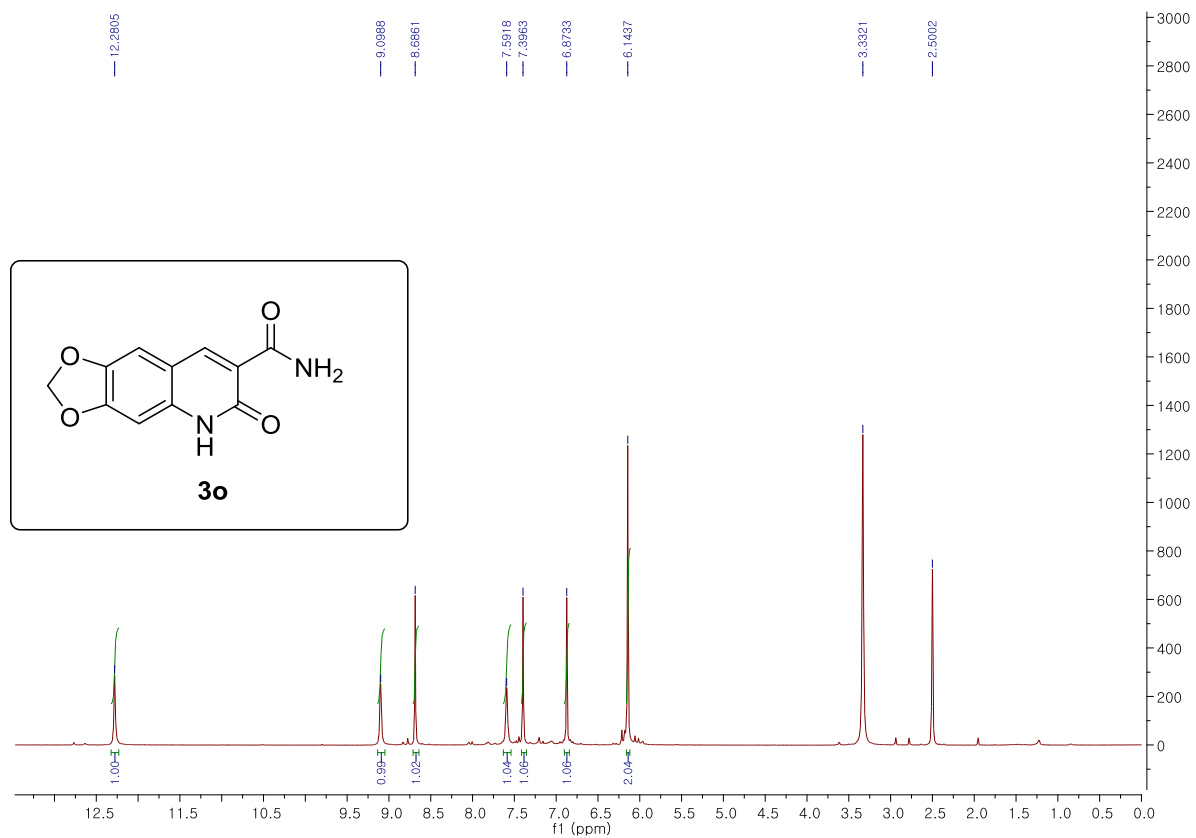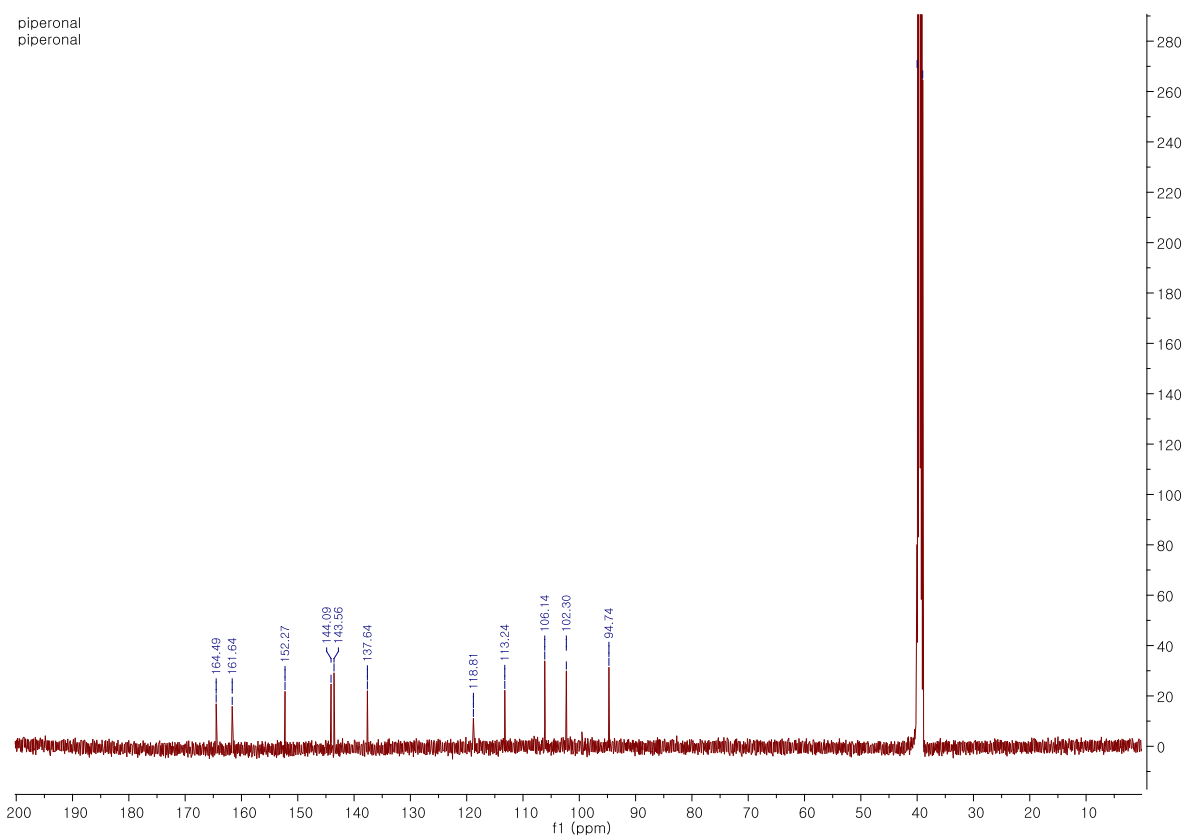

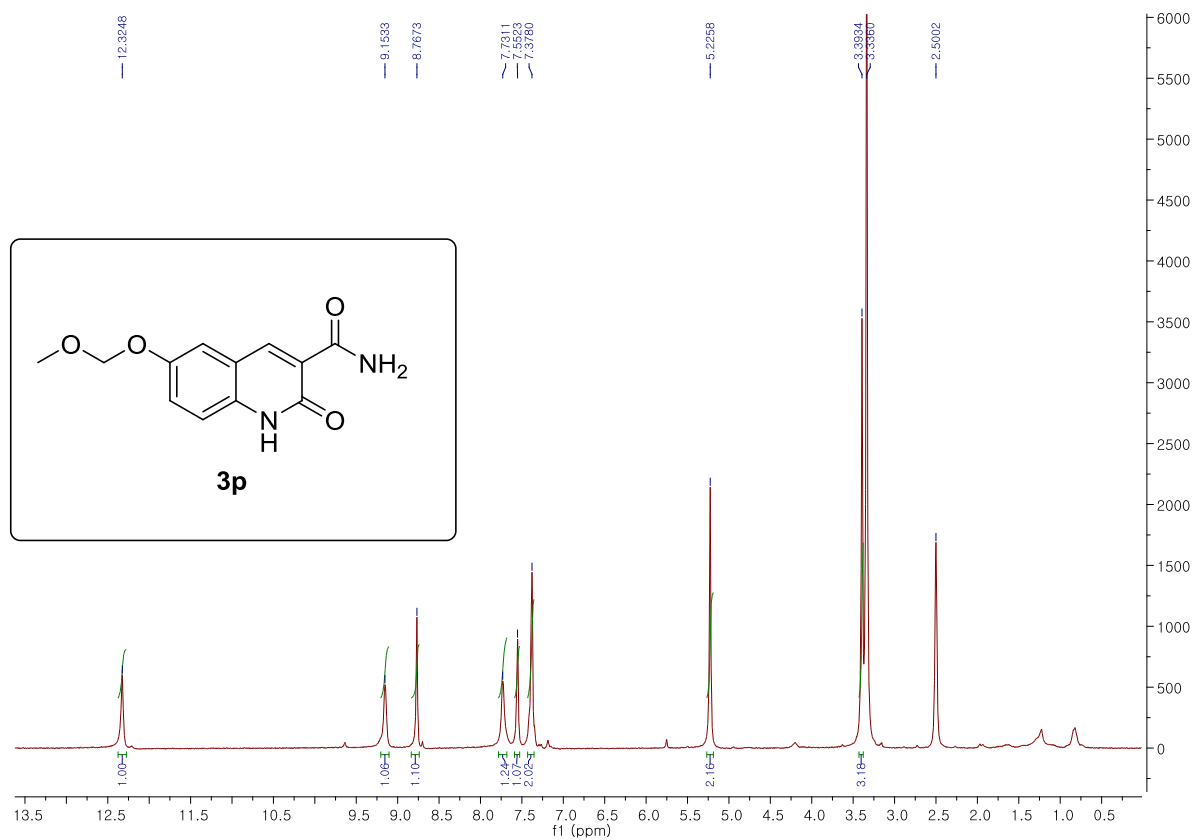

5-mom-20180517  
5-mom-20180517

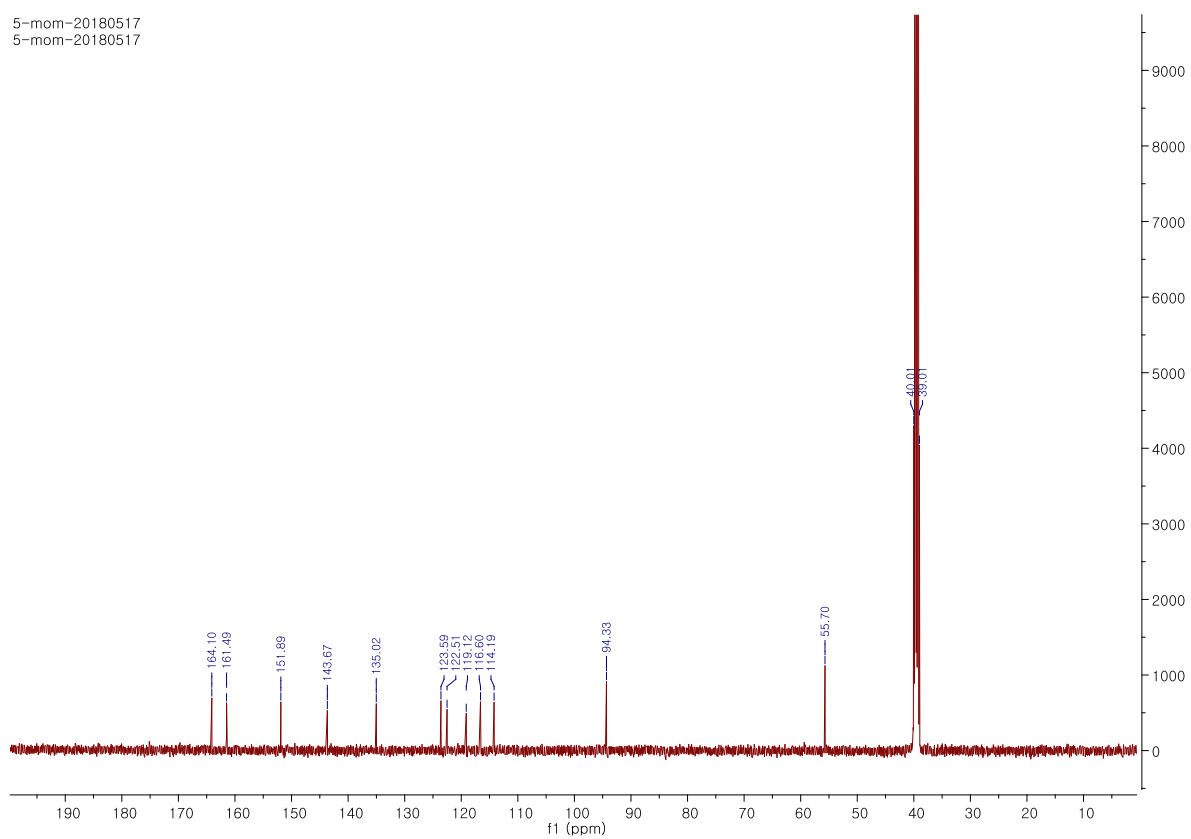



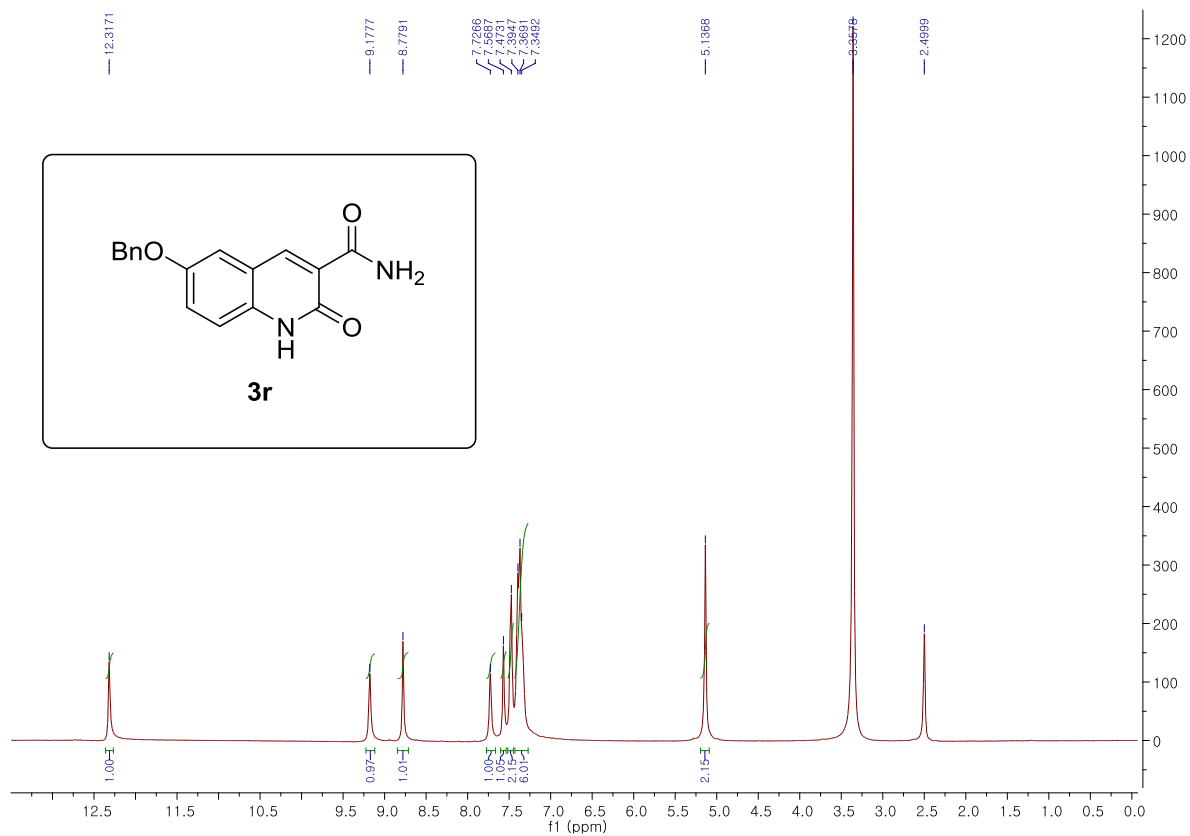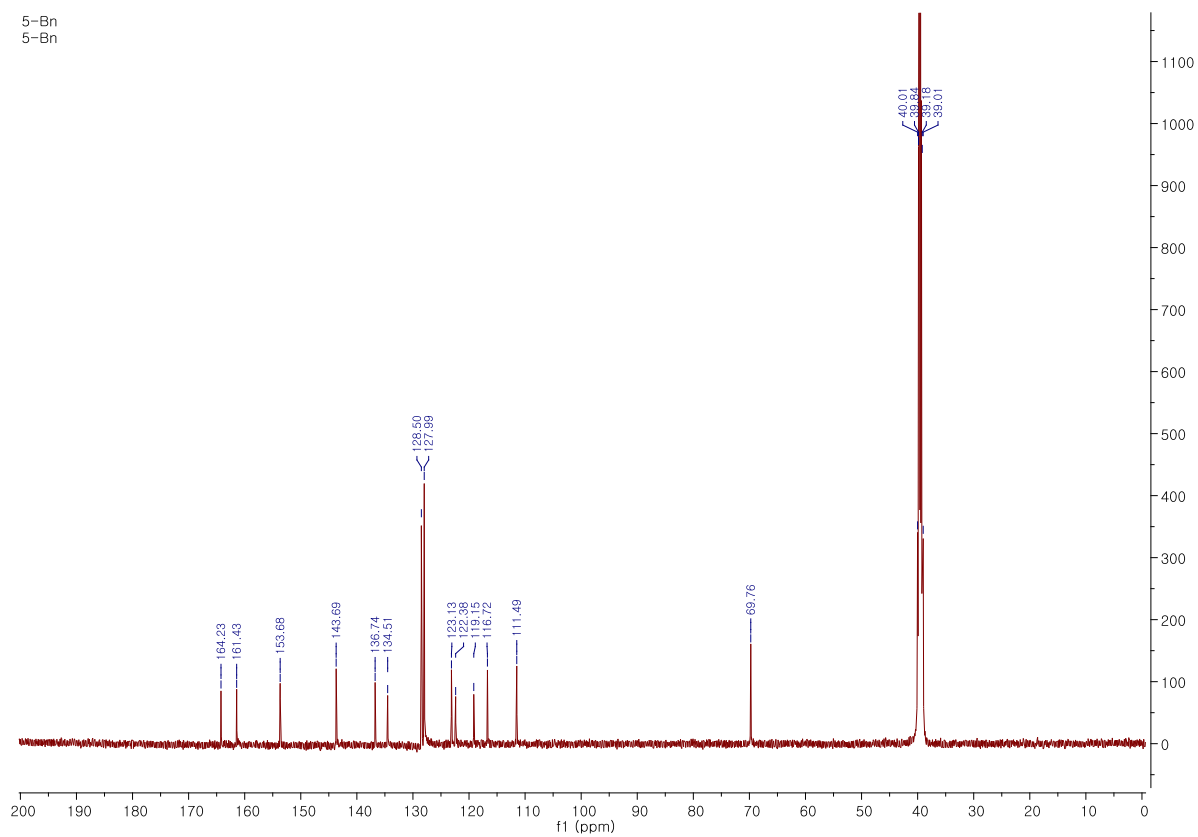

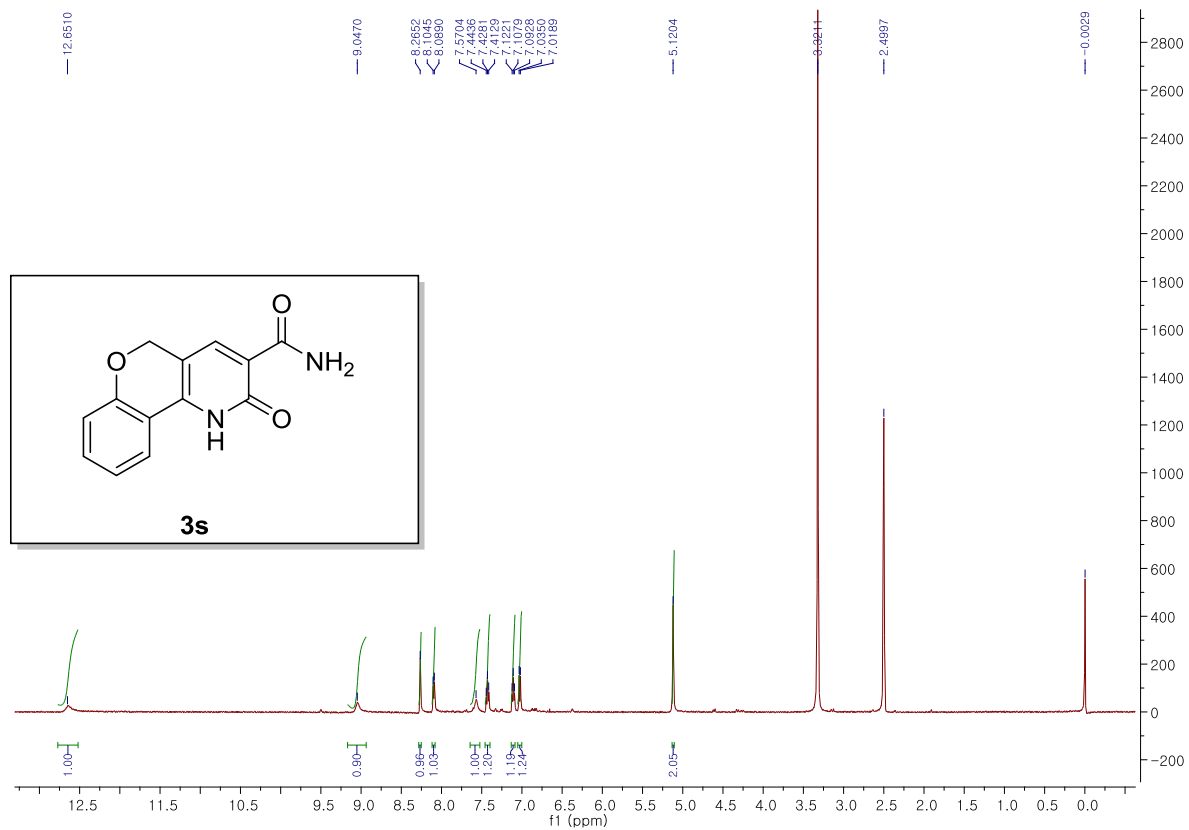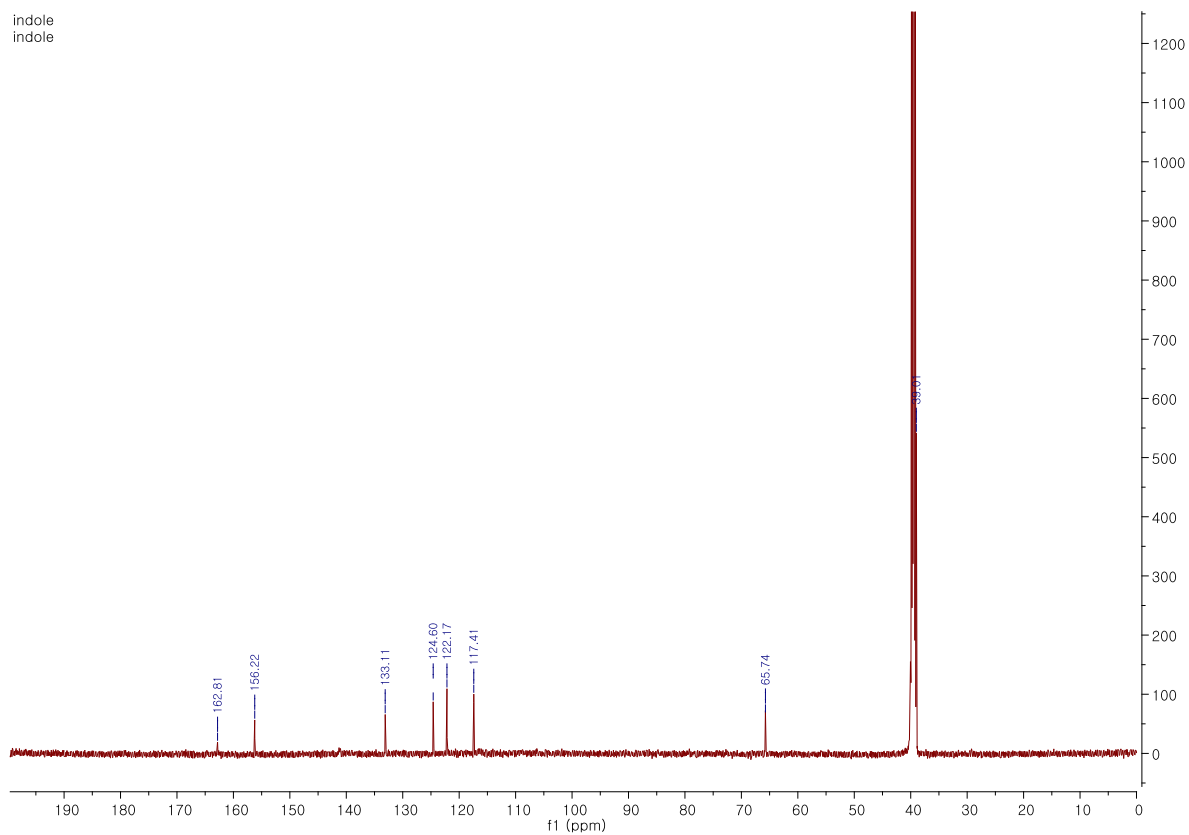

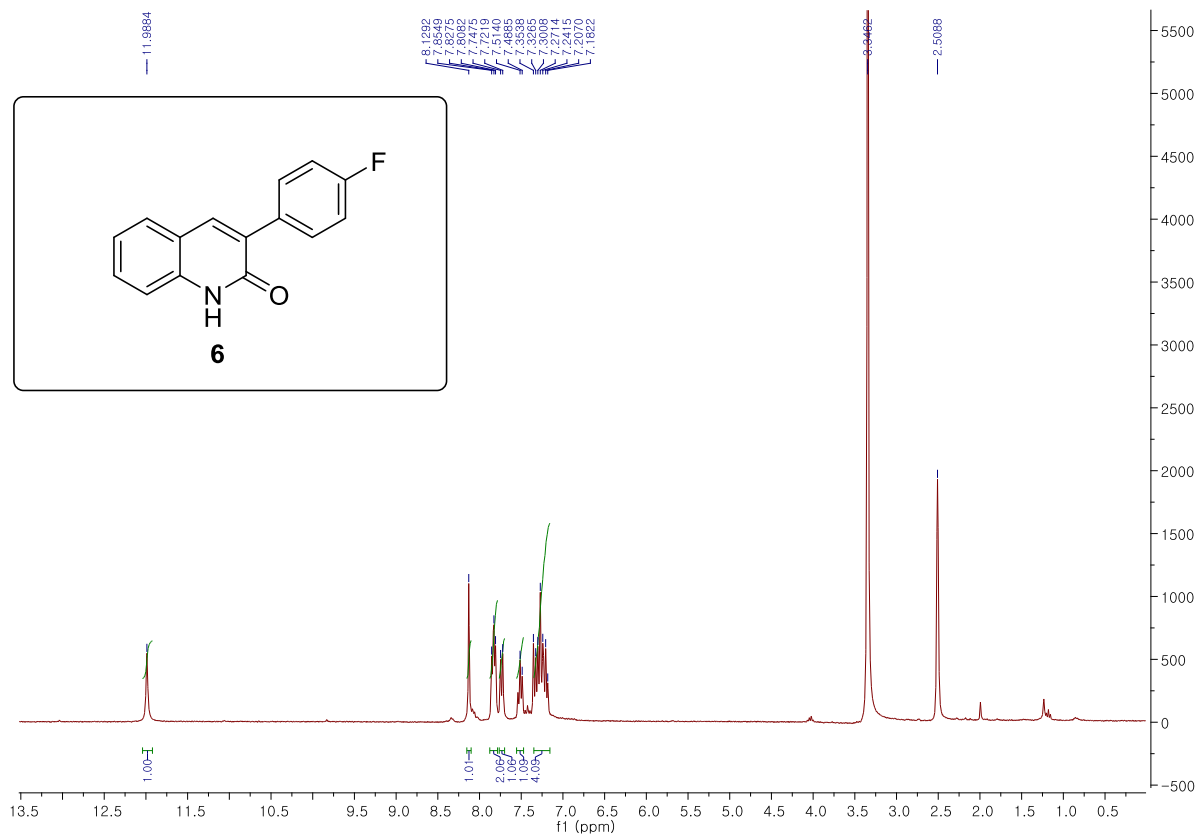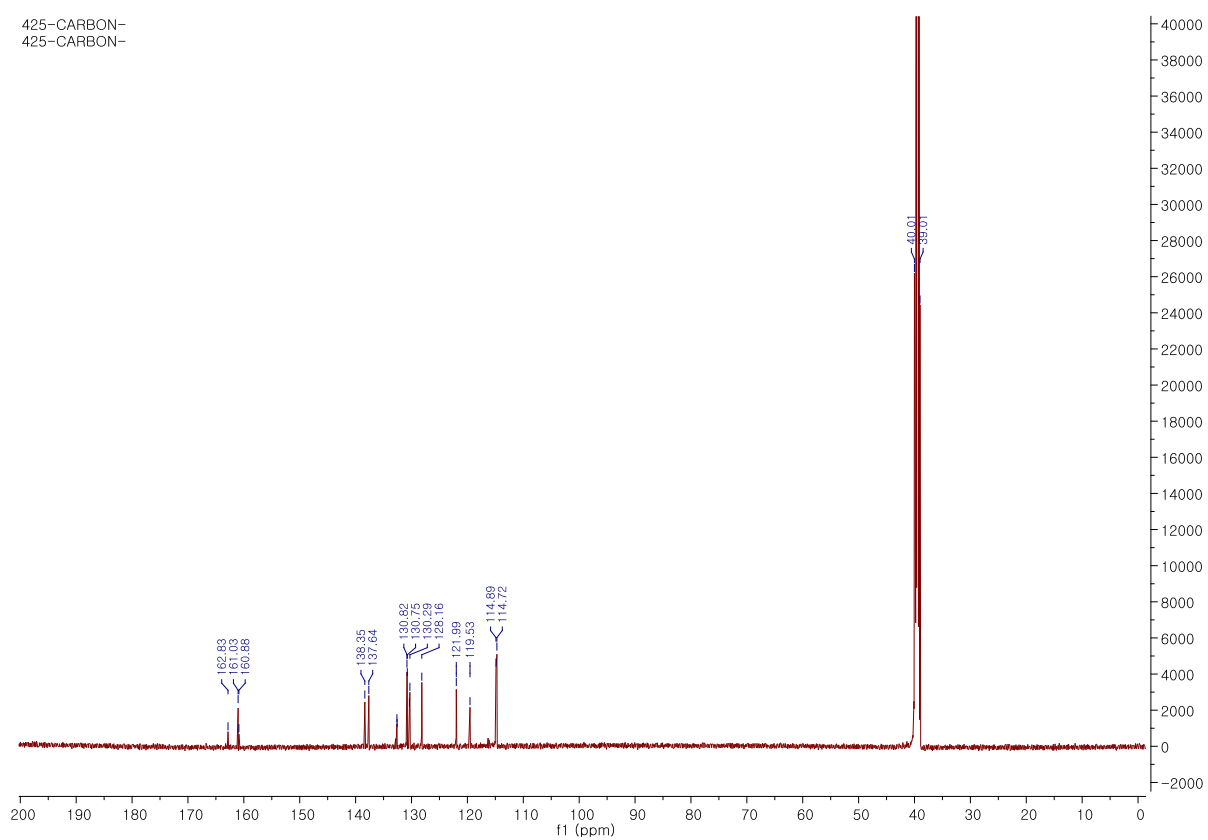

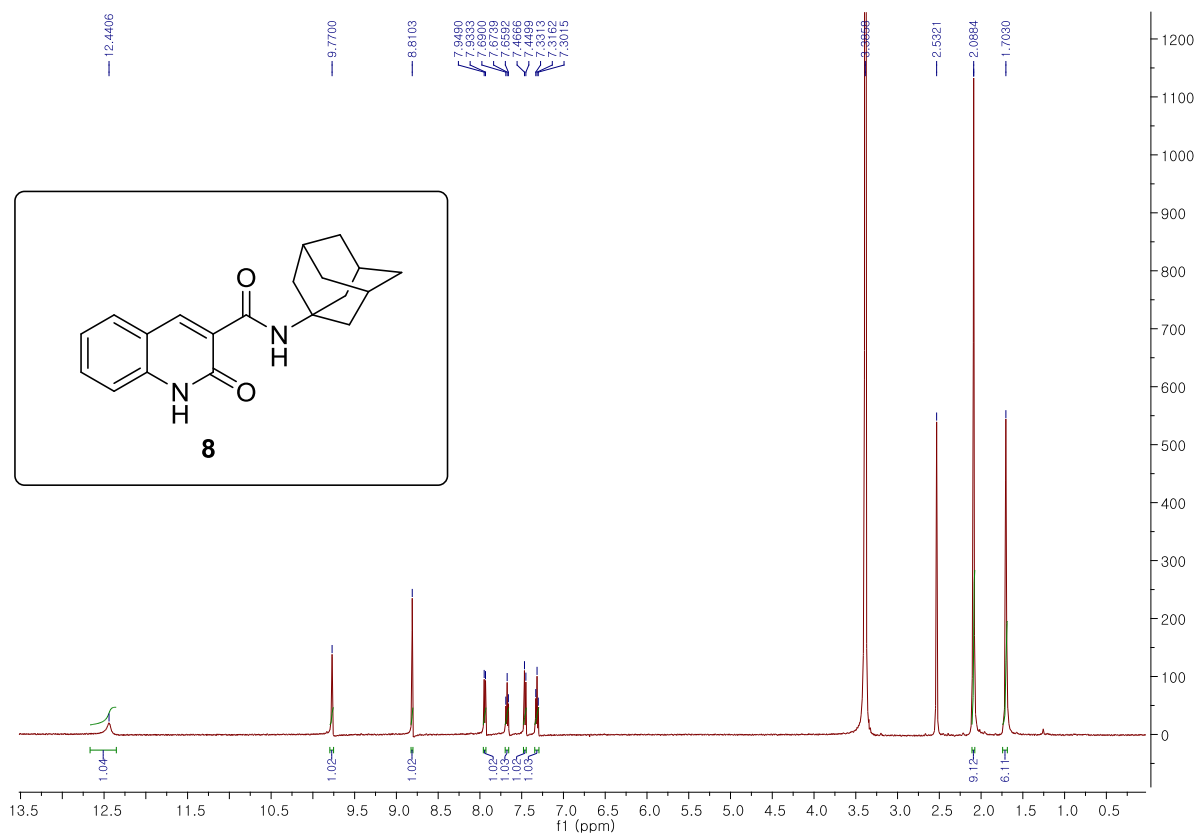

ADA-Pr-Carbon-20180527  
ADA-Pr-Carbon-20180527

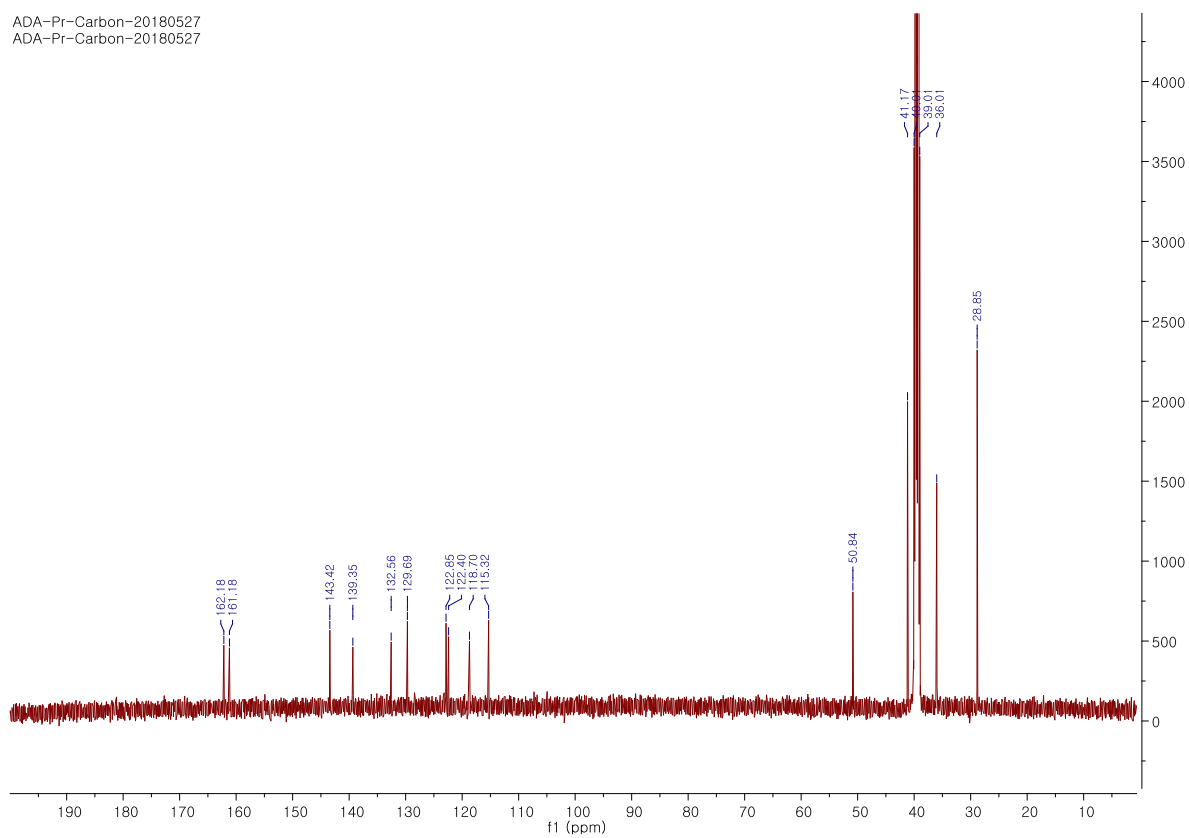



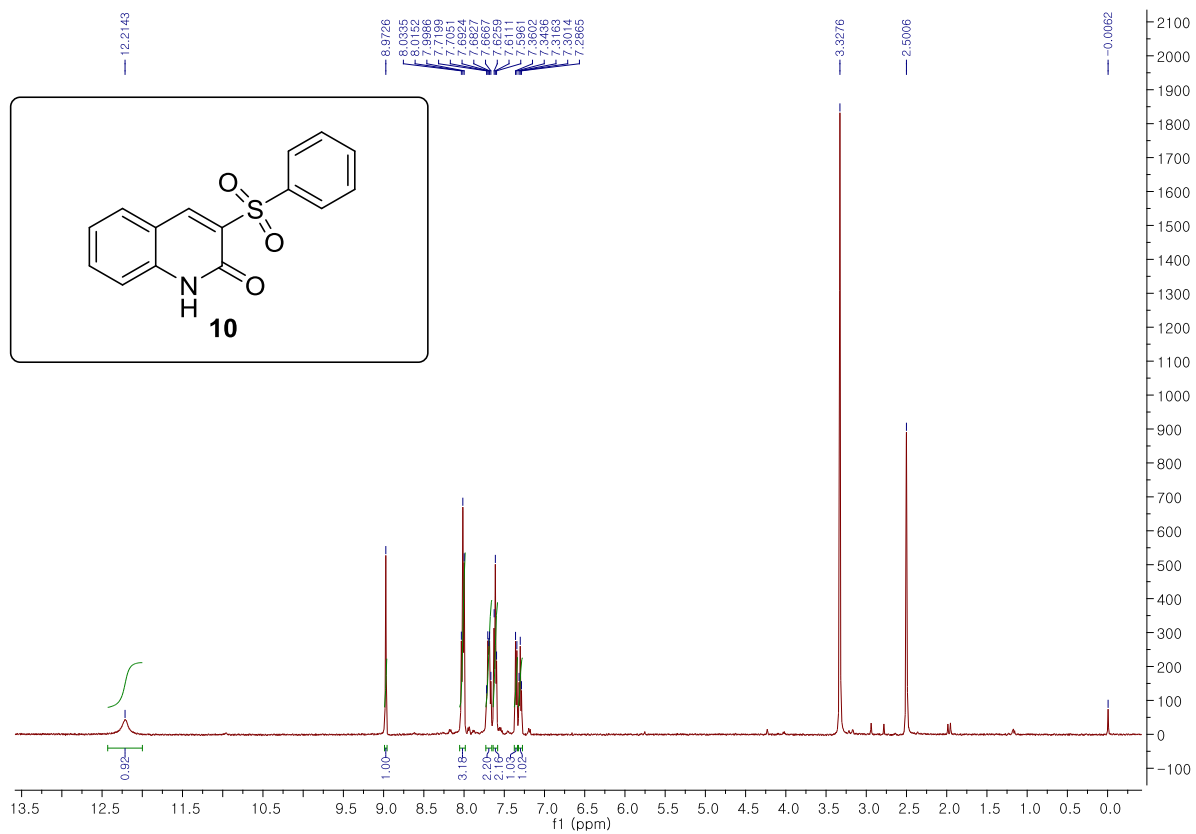

Sulfur-pr-500-Carbon-dmso  
Sulfur-pr-500-Carbon-dmso

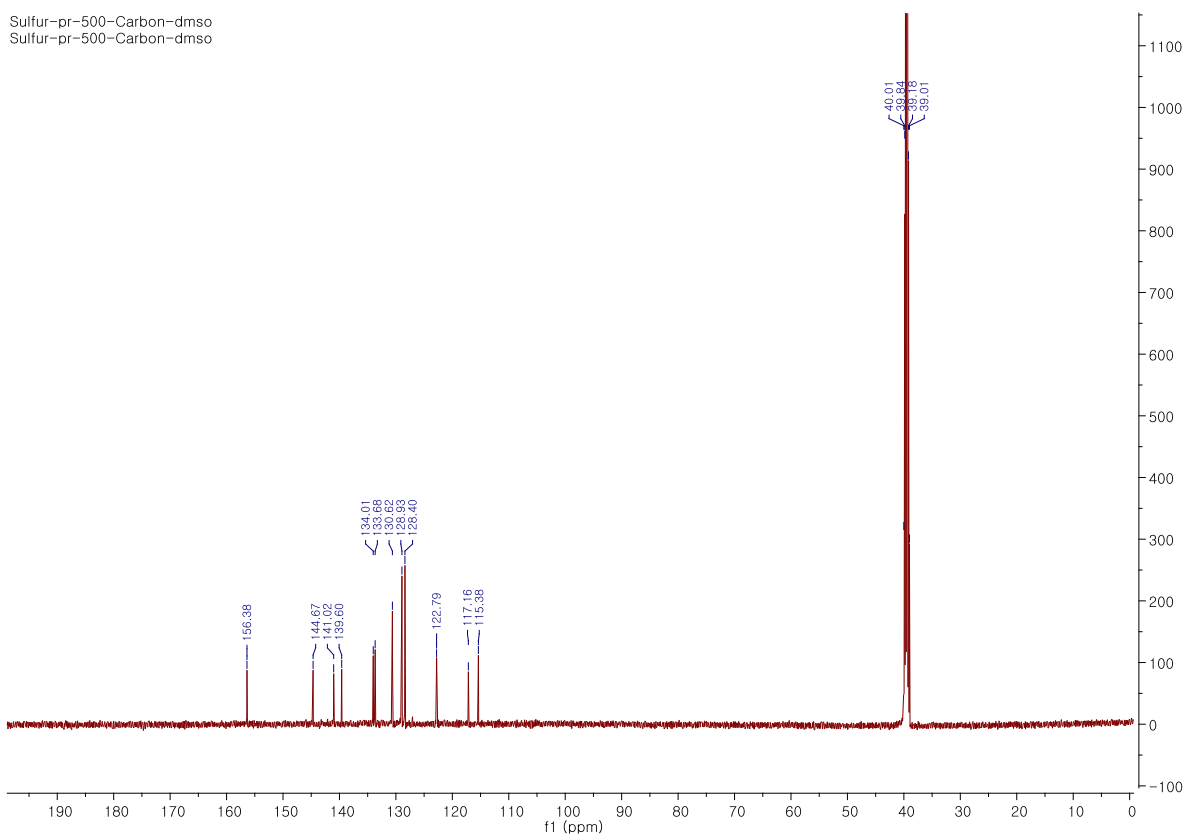

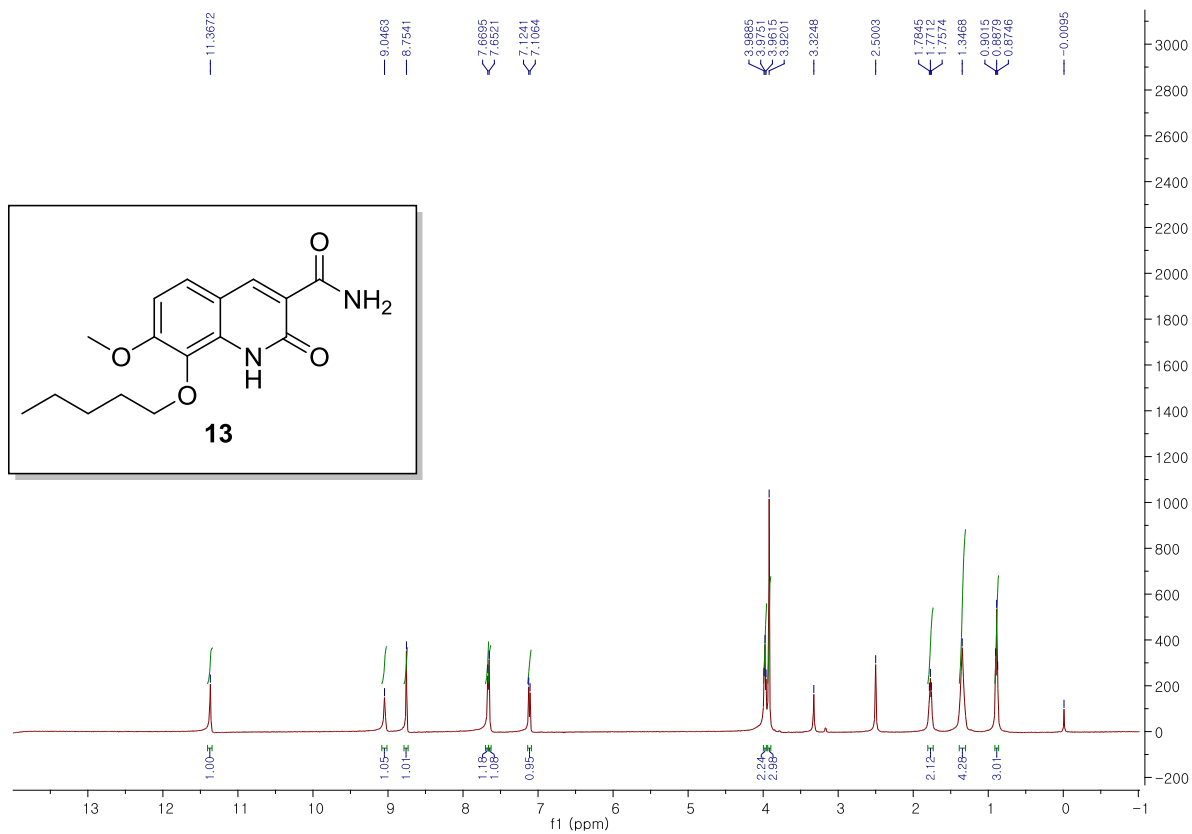

SEC-461-Carbon-20180530  
SEC-461-20180530

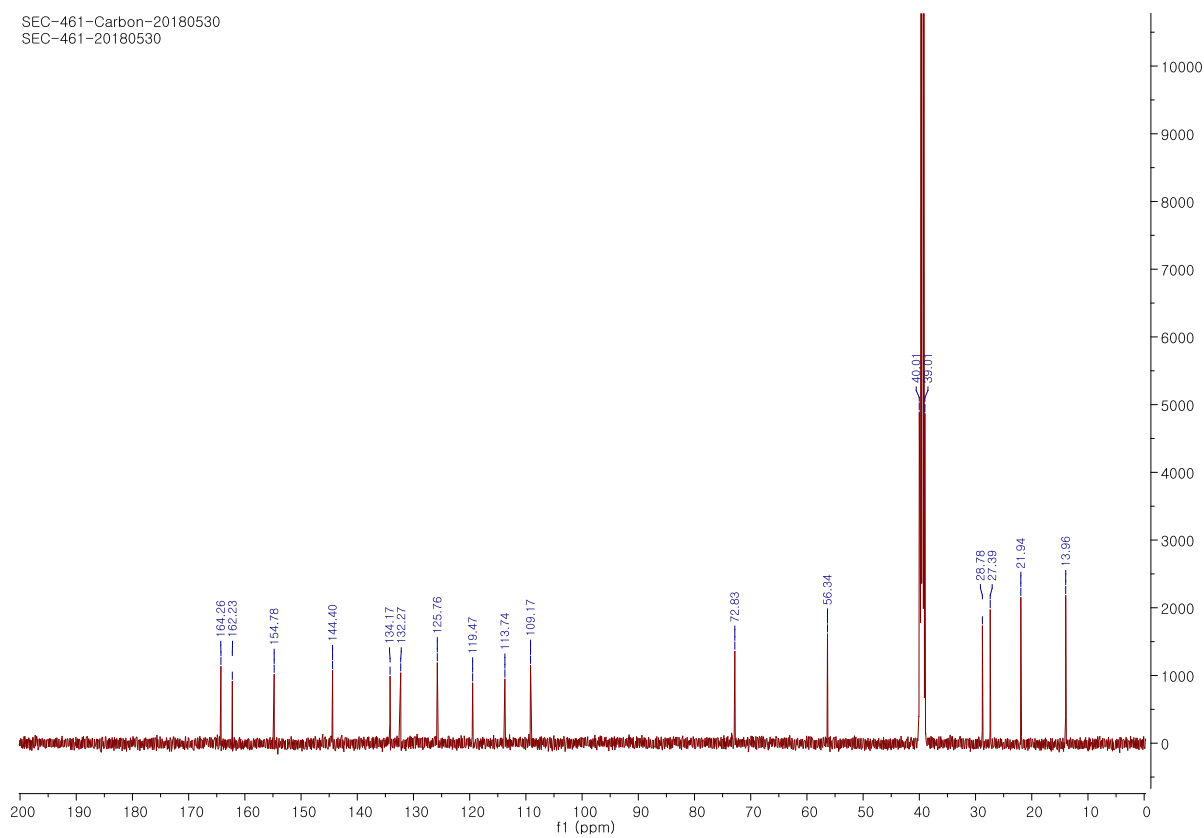

Supplement: c8ob01994k1.pdf [file c8ob01994k1.pdf]
